# 1 Sex-biased reduction in reproductive success drives selective constraint on 2 human genes

3

4 Eugene J. Gardner<sup>1</sup>, Matthew D. C. Neville<sup>1</sup>, Kaitlin E. Samocha<sup>1</sup>, Kieron Barclay<sup>2,3</sup>, Martin  
5 Kolk<sup>3</sup>, Mari E. K. Niemi<sup>1</sup>, George Kirov<sup>4</sup>, Hilary C. Martin<sup>1</sup>, Matthew E. Hurles<sup>1,\*</sup>

6

7 <sup>1</sup>Wellcome Sanger Institute, Wellcome Genome Campus, Cambridge, Hinxton, United  
8 Kingdom

9 <sup>2</sup>Max Planck Institute for Demographic Research, Rostock, Germany

10 <sup>3</sup>Demography Unit, Department of Sociology, Stockholm University, Stockholm, Sweden

11 <sup>4</sup>Division of Psychological Medicine and Clinical Neurosciences, School of Medicine, Cardiff  
12 University, Cardiff, UK

13 \*meh@sanger.ac.uk

## 14 Summary

15 Genome-wide sequencing of human populations has revealed substantial variation among  
16 genes in the intensity of purifying selection acting on damaging genetic variants. While  
17 genes under the strongest selective constraint are highly enriched for Mendelian disorders,  
18 most of these genes are not associated with disease and therefore the nature of the  
19 selection acting on them is not known. Here we show that genetic variants that damage  
20 these genes reduce reproductive success substantially in males but much less so in  
21 females. We present evidence that this reduction is mediated by cognitive and behavioural  
22 traits, which renders male carriers of such variants less likely to find mating partners. Our  
23 findings represent strong genetic evidence that Darwin's theory of sexual selection is  
24 shaping the gene pool of contemporary human populations. Furthermore, our results  
25 suggest that sexual selection can account for about a quarter of all purifying selection acting  
26 on human genes.

## 27 Main text

28 The most damaging genetic variants, gene deletions and protein-truncating variants (PTVs),  
29 are removed from the population by selection with strength that varies substantially from  
30 gene to gene<sup>1,2</sup>. The strength of selection against heterozygous PTVs has been estimated by  
31 the selection coefficient,  $s_{\text{het}}$ , which exhibits a continuous spectrum across human genes<sup>3,4</sup>,  
32 although most attention has been focused on a subset of ~3,000 genes with the highest  
33 'probability of Loss-of-function Intolerance' (pLI)<sup>1</sup>.

34

35 The selection pressures acting on these most selectively constrained genes have not been  
36 fully characterised, but, *a priori*, could include natural selection increasing pre-reproductive  
37 mortality or decreasing fertility, and sexual selection acting on mate choice or intra-sexual  
38 competition<sup>5,6</sup>. Gene deletions and PTVs in these genes have been shown to be associated  
39 with lower educational attainment<sup>5,7</sup> and general intelligence<sup>8</sup>, as well as increased risk of  
40 intellectual disability, and some psychiatric disorders<sup>9</sup>. Moreover, these constrained genes  
41 are strongly enriched for dominant early-onset Mendelian diseases (including many

42 neurodevelopmental disorders), many of which are associated with increased  
43 pre-reproductive mortality, indicating that natural selection likely makes a substantive  
44 contribution to this selective constraint. However, the majority (65%) of constrained genes  
45 ( $pLI > 0.9$ ) have not yet been associated with a Mendelian disease. This raises the  
46 fundamental question of whether natural selection represents the sole mechanism imposing  
47 this form of selective constraint on human genes, or whether other forms of selection are at  
48 work.

49

50 To explore the nature of selection acting on these genes we identified PTVs and genic  
51 deletions in the UK Biobank<sup>10</sup> comprising largely post-reproductive individuals (median age  
52 at recruitment: 58 years, range: 39-73 years), and investigated the association with  
53 reproductive success. We called large copy number variants (deletions and duplications)  
54 from SNP genotyping array data on 340,925 unrelated participants of European ancestry  
55 (Supplementary Figure 1), and identified PTVs from exome sequencing among a subset of  
56 34,812 participants (Supplementary Figure 2)<sup>11</sup>. For each participant, we then calculated the  
57 cumulative burden of private (only observed in one individual) genic deletions and PTVs by  
58 combining  $s_{het}$  selection coefficients of each autosomal gene impacted by these variants  
59 (under the assumption that fitness is multiplicative, see Methods), which we term their  $s_{het}$   
60 burden. The distribution of  $s_{het}$  burden was statistically indistinguishable between males and  
61 females: for participants with only genic deletion data available, 0.56% and 0.54%  
62 respectively had an  $s_{het}$  burden  $\geq 0.15$  (Fisher's  $p=0.66$ ; Figure 1B), and for participants with  
63 both genic deletion and PTV data available the analogous proportions were 6.99% and  
64 7.06% (Fisher's  $p=0.80$ ; Figure 1C).

65

66 We assessed the relationship between  $s_{het}$  burden and number of children, using a linear  
67 regression correcting for age and population structure (Methods; Supplementary Figure 3).  
68 We observed that an  $s_{het}$  burden of 1 is associated with a decrease in the overall total  
69 number of overall children for both males (0.54 fewer children [95% CI 0.36-0.71],  
70  $p=1.5 \times 10^{-9}$ ) and females (0.18 fewer children [95% CI 0.02-0.34],  $p=0.03$ ) when combining  
71 results from deletion and PTV-based analyses.

72

73 To determine if our observed effect of  $s_{het}$  burden was due to an actual reduction in overall  
74 number of children or a result of selection against having children at all, we performed two  
75 analyses. Firstly, we evaluated childlessness using logistic regression. We again observed a  
76 striking sex difference in participants' probability of having any children given their  $s_{het}$   
77 burden, for both PTVs and genic deletions (Figure 1, Supplementary Table 1). Combining  
78 the analyses of genic deletions and PTVs, we found that an  $s_{het}$  burden of 1 decreases the  
79 probability of males having any children (OR=0.28 [95% CI 0.20-0.39],  $p=4.0 \times 10^{-14}$ ) much  
80 more than females (OR=0.69 [95% CI 0.48-0.95],  $p=0.03$ ). Secondly, if we remove childless  
81 individuals from the analysis,  $s_{het}$  burden ceases to have a significant effect on the number of  
82 offspring, confirming that the observed decrease in reproductive success is determined  
83 largely by increased childlessness (Supplementary Figure 4). As UK Biobank participants  
84 included in our model are biased towards females (54%), our observed sex bias is not due to  
85 having greater statistical power to detect an effect on reproductive success in males. We  
86 also observed that private duplications and likely damaging private missense variants exhibit  
87 similar but weaker effects on childlessness (Supplementary Figure 8).

88

89 We observed consistent sex-bias in the association of  $s_{het}$  with childlessness when  
 90 performing this analysis in different ways, including: (i) limiting our analyses to carriers of  
 91 private genic deletions or PTVs in the genes under most selective constraint (following  
 92 thresholds set by their authors:  $pLI \geq 0.9$  or  $s_{het} \geq 0.15$ ; Supplementary Figure 5), (ii)  
 93 extending our analysis to more frequent, but still rare genic deletions and PTVs  
 94 (Supplementary Figure 6), (iii) excluding genes known to cause Mendelian disorders (male  
 95 OR=0.31 [95% CI 0.21-0.47],  $p=1.4 \times 10^{-8}$ ), (iv) restricting our analysis to individuals in  
 96 specific age ranges (Supplementary Figure 7).

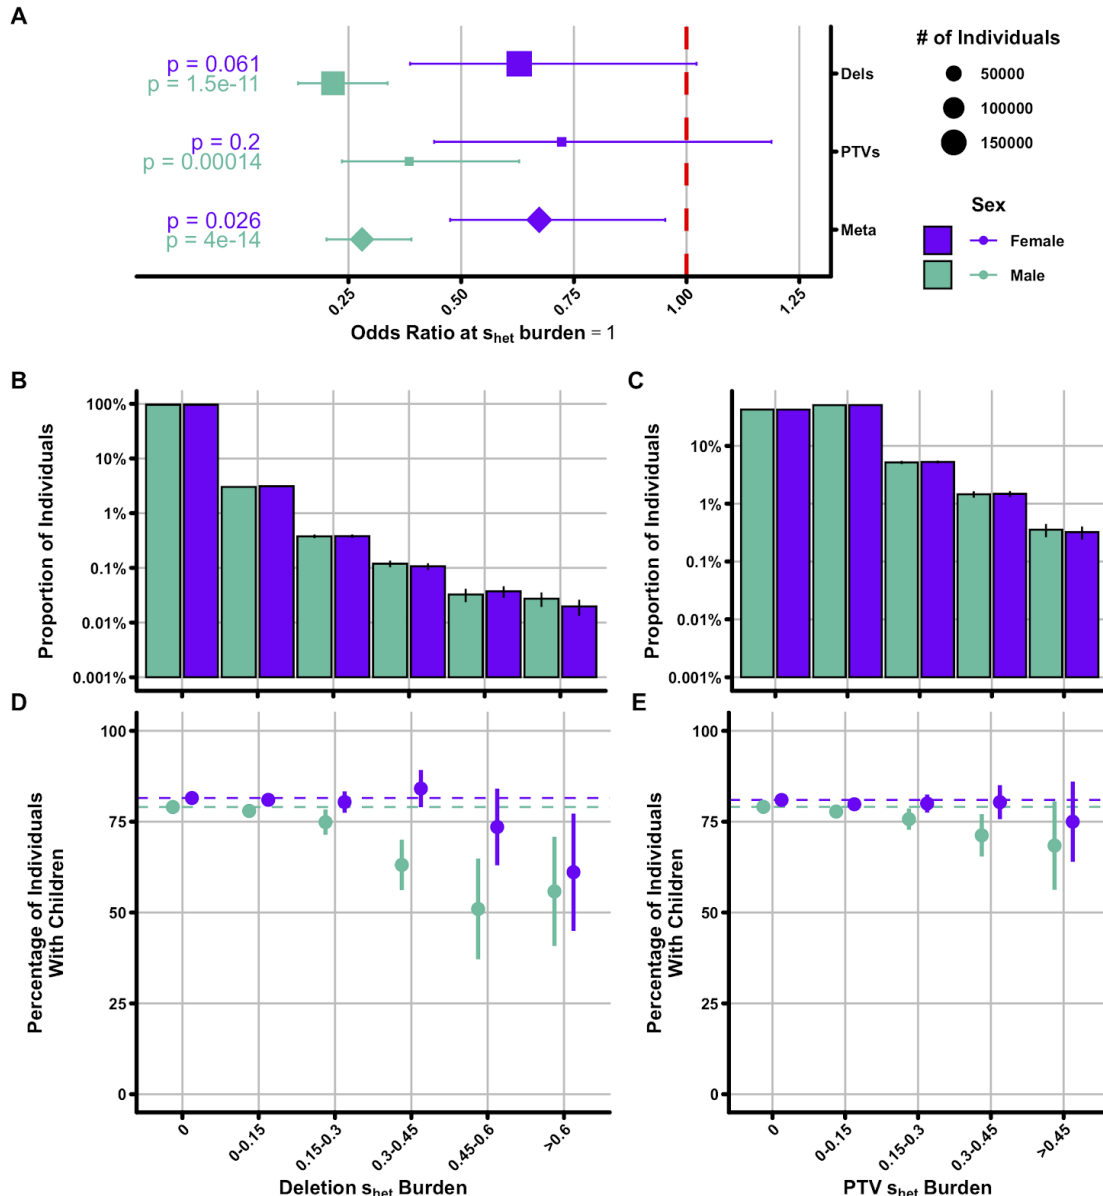

98 **Figure 1. Differences in male and female reproductive success as a function of cumulative rare**  
 99 **deleterious genetic variation.** (A) Odds ratio estimates for the effect of cumulative deleterious  
 100 variation for deletions, PTVs, and a combined meta-analysis on childlessness separated for males  
 101 (jade) and females (violet). Number of individuals included in each analysis is indicated by the size of  
 102 the point. (B; C) Proportion of individuals in 0.15  $s_{het}$  bins for deletions (B) and PTVs (C). (D; E)  
 103 Percentage of individuals with children in bins based on  $s_{het}$  burden for deletions (D) and PTVs (E). All  
 104 error bars are 95% confidence intervals calculated on the population proportion.

105

106 We considered two hypotheses that could account for increased childlessness: (i) impaired  
107 fertility (e.g. inability to produce viable gametes), and (ii) cognitive and behavioural factors  
108 (which could decrease ability to find a mate, or increase voluntary childlessness). Two lines  
109 of evidence suggest impaired fertility is not the predominant cause of this observation. First,  
110 removing all 150 autosomal genes for which at least limited evidence exists of an  
111 association to male infertility<sup>12</sup> had minimal impact on the association with male reproductive  
112 success (OR=0.28 [95% CI 0.20-0.39],  $p=4.7 \times 10^{-14}$ ). Second, genes under the highest  
113 selective constraint ( $s_{\text{het}} \geq 0.15$ ) are not associated with higher expression levels in testis,  
114 unlike the genes currently known to be associated with male infertility (Supplementary Figure  
115 9).

116

117 By contrast, there is substantial existing evidence that behavioural and cognitive traits  
118 influence reproductive success in a sex-biased manner. First, the reduced reproductive  
119 success associated with a range of psychiatric disorders is much more pronounced in males  
120 than in females<sup>13</sup>. Second, personality traits associated with increased reproductive success  
121 differ between males and females, with increased extraversion in males but greater  
122 neuroticism in females being linked to increased reproductive success<sup>14</sup>. Third, although the  
123 most highly ranked mate characteristics are highly concordant between the sexes<sup>15</sup>, some  
124 mate preferences differ between the sexes, with males placing greater value on physical  
125 attractiveness and females valuing cues relating to earning potential<sup>14,16-18</sup>. Finally, low  
126 socioeconomic status and low educational attainment have been more strongly linked to  
127 increased childlessness in males than females across populations<sup>19-22</sup>. This has typically  
128 been ascribed to males of lower socioeconomic status finding it harder to attract a  
129 partner<sup>23,24</sup>.

130

131 Some of these observations about sex-biased reproductive success have been related to  
132 parental investment theory<sup>25</sup>. This hypothesis posits that sexual selection by mate choice is  
133 driven, in large part, by different levels of investment by males and females in their offspring.  
134 This drives the sex that invests more in offspring (typically female) to be more discriminating  
135 in their choice of mates, especially with regard to their potential to invest in offspring.  
136 However, a sex-biased reduction in reproductive success need not be caused by sex  
137 differences in mate preferences; it could also be caused by a sex bias in trait severity  
138 coupled to mate choice preferences that are not sex-biased. These mechanisms are not  
139 mutually exclusive; both could be contributing to an overall sex-biased reduction in  
140 reproductive success, albeit on different traits.

141

142 A key prediction of the hypothesis that mate choice underpins the observation of a  
143 male-biased association of  $s_{\text{het}}$  burden with increased childlessness is that males with a high  
144  $s_{\text{het}}$  burden should find it harder to find mates than females. We observed that UK Biobank  
145 participants with high  $s_{\text{het}}$  burden were also significantly less likely to be currently living with a  
146 partner, and that, like reproductive success, this effect was significantly stronger in males  
147 than in females (Figure 2A). Given the very strong association for UK Biobank males  
148 between currently living with a partner and having children (OR=5.79 [95% CI 5.63-5.95],  $p$   
149  $< 1 \times 10^{-100}$ ; Supplementary Figure 10), we estimated that the lower likelihood of currently  
150 living with a partner explains a substantial fraction (~30%) of the association between  $s_{\text{het}}$

151 burden and increased male childlessness. We note that the status of currently living with a  
 152 partner is an imperfect proxy for partner status during peak reproductive years, but the latter  
 153 information is not currently available in UK Biobank. Therefore, it is likely that the lack of a  
 154 partner during peak reproductive years likely explains a greater fraction of increased male  
 155 childlessness than estimated here. We observed no significant impact of  $s_{het}$  burden on the  
 156 likelihood of having engaged in same sex sexual behaviour (OR=1.25 [95% CI 0.59-2.68],  
 157  $p=0.56$ ; Supplementary Figure 11), which is also strongly associated with increased  
 158 childlessness in UK Biobank (male OR=0.14 [95% CI 0.13-0.15],  $p<1\times 10^{-100}$ ; female  
 159 OR=0.27 [95% CI 0.25-0.29]  $p<1\times 10^{-100}$ ; Supplementary Figure 10).

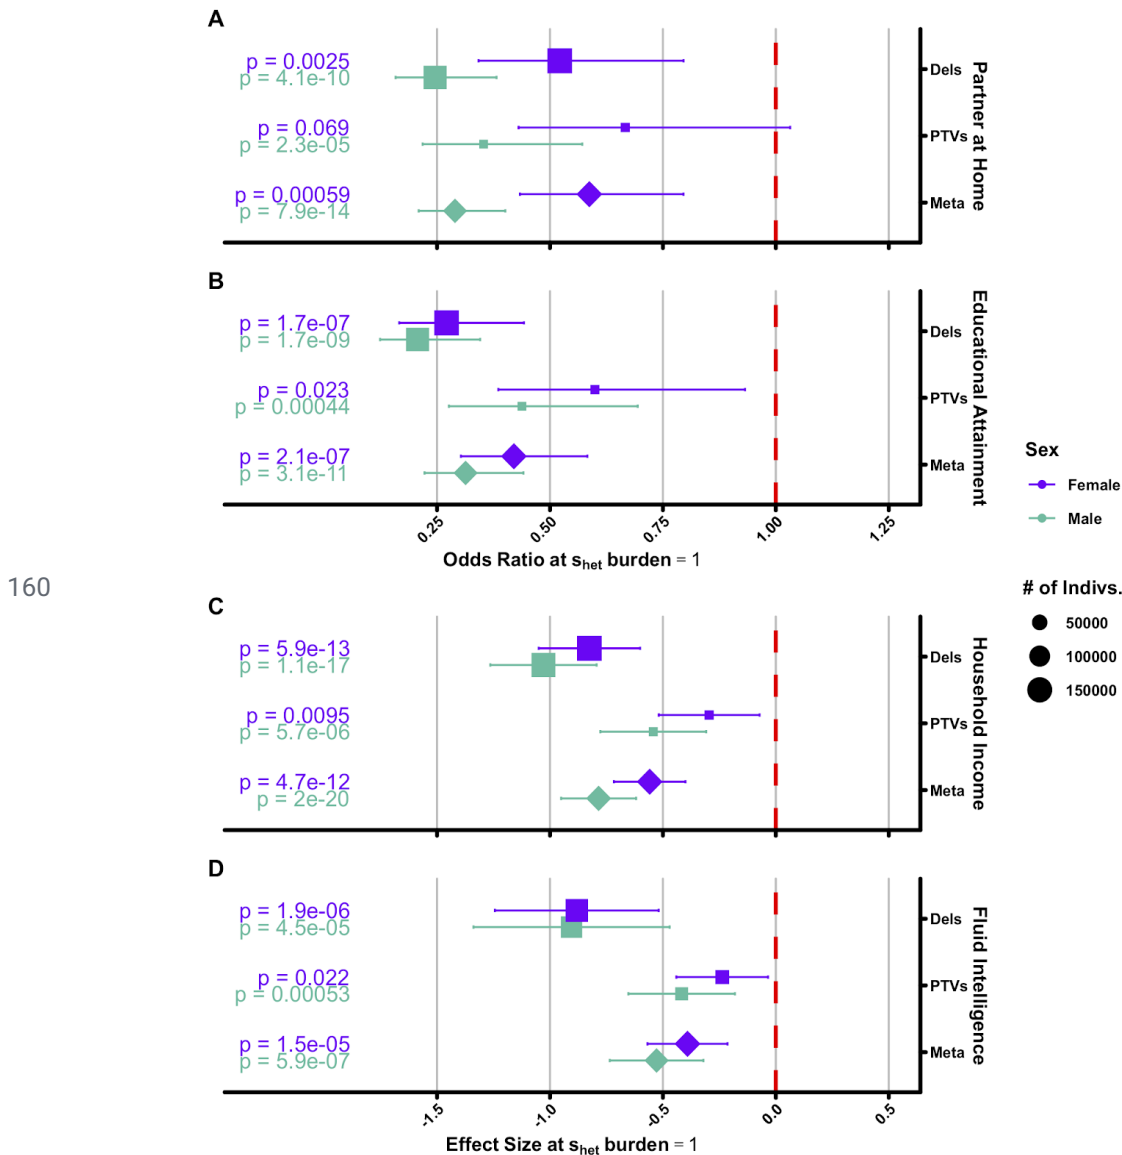

161 **Figure 2. Effect of  $s_{het}$  burden on traits known to be associated with reproductive success.**  
 162 Shown are similar plots to Figure 1a, except for four phenotypes which have been previously  
 163 associated with reproductive success: (A) having a partner at home, (B) educational attainment as  
 164 measured by college completion, (C) household income (as measured by income bracket and  
 165 corrected for having a partner at home; see methods), and (D) fluid intelligence (in standard  
 166 deviations). For each trait, we tested using a logistic (A,B) or linear (C,D) model the effect of  $s_{het}$   
 167 burden on each phenotype shown above, corrected for age, age<sup>2</sup>, and the first ten ancestry principal  
 168 components.

169

170 We explored in UK Biobank whether the impact of  $s_{\text{het}}$  burden on reproductive success might  
171 plausibly be mediated through some of the specific factors highlighted by the previous  
172 psychiatric, demographic and psychosocial research summarised above. Firstly we  
173 investigated its impact on cognition as measured by fluid intelligence in 110,190 (51,378  
174 males, 58,812 females) UK Biobank participants. We found that  $s_{\text{het}}$  burden was associated  
175 with significantly reduced fluid intelligence scores of males and females with similar effect  
176 sizes (Figure 2D). Increasing  $s_{\text{het}}$  burden is also associated with lower household income and  
177 educational attainment (Figure 2B,C), again with similar effect sizes in males and females.  
178 To evaluate the potential impact of this reduced cognition on male reproductive success, we  
179 extended previously published work relating the results of IQ tests taken by 95% of Swedish  
180 males (during military conscription) to their completed family size<sup>26</sup>. We estimated that the  
181 decrement in cognition observed in UK Biobank males accounts for 6.3% [95% CI  
182 5.3%-8.6%] of the reduced male reproductive success associated with high  $s_{\text{het}}$  burden  
183 (Supplementary Figure 12, Methods). We also note that the decrease of reproductive  
184 success with decreasing IQ was most pronounced in males with IQ<70 (Supplementary  
185 Figure 13)<sup>26</sup>, who are likely depleted in UK Biobank relative to the general population.

186

187 Analysis of psychiatric disorders in UK Biobank is complicated by both recruitment bias away  
188 from more severe psychiatric disorders<sup>10,27,28</sup> and incomplete data on participants. Mental  
189 health data for most UK Biobank participants are only available from ICD10 codes derived  
190 from secondary care data (hospital-based; Supplementary Table 1), which likely  
191 underestimates the true prevalence of mental health disorders. More complete data is  
192 available on a subset of UK Biobank individuals from a mental health questionnaire for which  
193 participants were invited by email<sup>28</sup>. We observed that a high  $s_{\text{het}}$  burden was very strongly  
194 associated with not having an email address (male OR=0.30 [95% CI 0.22-0.42],  
195  $p=2.6 \times 10^{-13}$ ; female OR=0.48 [95% CI 0.35-0.65],  $p=3.5 \times 10^{-6}$ ; Supplementary Figure 14),  
196 which likely explains why individuals with a high  $s_{\text{het}}$  burden are under-represented among  
197 individuals completing the questionnaire (male OR=0.44 [95% CI 0.32-0.61],  $p=1.2 \times 10^{-6}$ ;  
198 female OR=0.40 [95% CI 0.30-0.55],  $p=6.6 \times 10^{-9}$ ; Supplementary Figure 14).

199

200 Despite the limitations of mental health data in UK Biobank, they corroborated that a high  $s_{\text{het}}$   
201 burden increases the risk of psychiatric disorders previously associated with reduced  
202 reproductive success (schizophrenia, autism, attention deficit hyperactive disorder, and  
203 bipolar disorder), and that these psychiatric disorders are associated with increased  
204 childlessness in both male (OR=0.30 [95% CI 0.26-0.35],  $p=1.5 \times 10^{-55}$ ) and female (OR=0.65  
205 [95% CI 0.56-0.77],  $p=3.2 \times 10^{-7}$ ) UK Biobank participants, albeit with substantial sex-bias  
206 (Supplementary Figure 10). This finding accords with a previous study showing that copy  
207 number variants associated with increased risk of schizophrenia are also associated with  
208 disproportionately reduced reproductive success in males<sup>29</sup>. Carriers of well-characterized  
209 neurodevelopmental disorder-associated copy number variants, which include those with a  
210 strong association to schizophrenia (Methods), only account for 3.7% ( $n = 12,593$ ) of  
211 individuals in UK Biobank. Removal of these individuals from our dataset does not  
212 significantly alter the association of  $s_{\text{het}}$  burden with reduced male reproductive success  
213 (OR=0.28 [95% CI 0.20-0.40],  $p=8.8 \times 10^{-13}$ ).

214

215 We subsequently limited the analysis of the impact of  $s_{het}$  burden on childlessness to  
216 individuals without any evidence of a mental health disorder associated with reduced  
217 reproductive success (from either ICD10 codes or the mental health questionnaire). We  
218 observed very similar effect sizes to when analysing all individuals (male OR=0.29 [95% CI  
219 0.20-0.40],  $p=1.5 \times 10^{-13}$ ; female OR=0.69 [95% CI 0.49-0.99],  $p=0.04$ ), suggesting that the  
220 effect on childlessness is not predominantly driven by this subset of mental health disorders.  
221 We explored this further, using data external to UK Biobank that are less affected by the  
222 limitations described above. Using previous estimates of the increased risk of mental health  
223 disorders caused by PTVs in highly constrained genes<sup>9</sup>, and the reduced reproductive  
224 success associated with those disorders<sup>13</sup>, we estimated that these mental health disorders  
225 likely account for 14% [7-31%] of the reduced male reproductive success associated with  
226 high  $s_{het}$  burden (Methods).  
227

228 Thus, in UK Biobank, both reduced fluid intelligence and increased risk of psychiatric  
229 disorders account for only modest proportions of increased male childlessness due to  $s_{het}$   
230 burden. A much larger proportion of the predicted reduction in overall fitness is explained by  
231 not currently having a partner (32% [31-32%]; Methods; Supplementary Figure 12).  
232

233

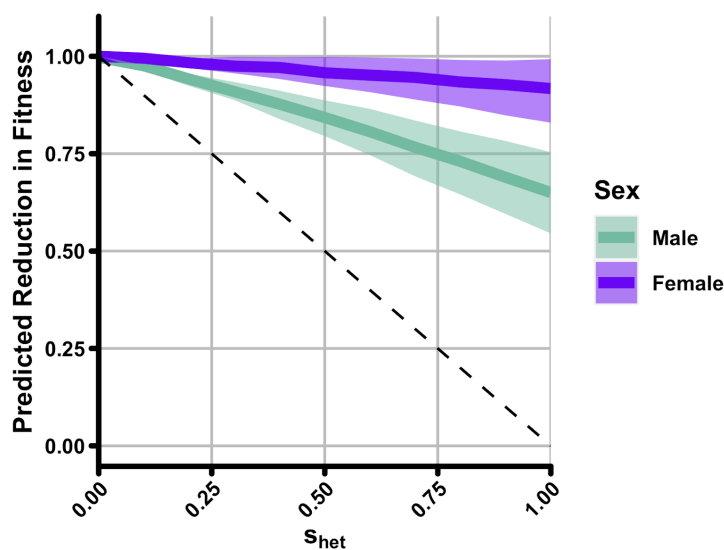

234 **Figure 3. Predicted reduction in overall fitness as a factor of individual  $s_{het}$  burden.** Displayed is  
235 the expected reduction in fitness as a factor of increasing  $s_{het}$  burden, independently for each sex.  
236 Error is shown as the lighter shaded area surrounding the trend line, and was determined based on  
237 the simulation of 100,000 individuals at varying  $s_{het}$  burdens based on the confidence intervals on the  
238 odds ratio as determined by our logistic regression model (Methods). The dashed line represents the  
239 theoretical reduction in fertility as predicted by  $S_{het}$ .  
240

241 Overall, we find that reduced reproductive success due to  $s_{het}$  burden explains 22% [13-31%]  
242 (Figure 3; Supplementary Figure 12) of the total reduction in fitness expected due to  
243 purifying selection against PTVs (Methods), with this reduction in fitness being much  
244 stronger in males. This suggests that such selection may not be borne equally by males and  
245 females. We note that current estimates of  $s_{het}$  are based on data from aggregated research  
246 cohorts. Participation in research has been shown to be biased with respect to gender,  
247 socioeconomic status and genetic variation<sup>30</sup>. As a consequence, individuals with high  $s_{het}$

248 burden may well be under-represented within research cohorts and PTVs within genes  
249 under strong selective constraint may well be segregating at higher frequencies in the  
250 general population than in research cohorts. This bias could result in the true value of  $s_{\text{het}}$   
251 being lower than currently estimated, and, consequently, the contribution of reduced  
252 reproductive success to the overall reduction in fitness due to purifying selection being  
253 greater than estimated here.

254

255 These estimates of reproductive success and selection coefficients are inevitably reflective  
256 of a population at a particular point in time. The proportionate contribution of reduced  
257 reproductive success to the overall reduction in fitness associated with genic purifying  
258 selection is likely to change over time. Medical advances over recent decades have altered  
259 the landscape of infertility and pre-reproductive mortality substantially. Moreover, overall  
260 childlessness is highly dynamic over time. Demographic data demonstrate that  
261 population-wide childlessness can double in just two decades, a nationwide trend that is  
262 readily apparent in UK Biobank (Supplementary Figure 15).

263

264 In summary, we find that reduced reproductive success, especially in males, makes a  
265 substantial contribution to purifying selection acting on human genes, and that this is likely  
266 mediated by mate choice on cognitive and behavioural traits. Mate preferences are  
267 multi-dimensional, and vary across cultures and time<sup>18</sup>. It is likely that male-biased reduced  
268 reproductive success associated with increasing  $s_{\text{het}}$  burden involves multiple cognitive and  
269 behavioural traits. The negative impact of  $s_{\text{het}}$  burden on fluid intelligence, household income  
270 and educational attainment, together with the previously documented female-biased  
271 preference for mates with good financial prospects<sup>15,17</sup> suggest that sex-biased mate  
272 preferences contribute in part to the sex-bias in reproductive success with increasing  $s_{\text{het}}$   
273 burden. However, as we are not able to assess the effect of  $s_{\text{het}}$  burden on all characteristics  
274 that are valued in a mate, especially those that are ranked most highly by both sexes (e.g.  
275 emotional stability and maturity)<sup>15</sup>, we cannot exclude that sex biases in the impact of  $s_{\text{het}}$   
276 burden on these traits also contribute to the sex bias in reproductive success.

277

278 Our findings may help to explain, at least in part, why only a minority of genes under the  
279 highest selective constraint have been associated with single gene disorders that increase  
280 pre-reproductive mortality or cause infertility. While there are clearly many more single gene  
281 disorders to be discovered among these genes<sup>31</sup>, we anticipate that these highly constrained  
282 genes will not be neatly divided into those that cause single gene disorders and those that  
283 impact on reproductive success without causing a clinical condition. Rather, we predict that  
284 damaging variants in many of these genes will perturb neurodevelopment resulting in a  
285 broad spectrum of cognitive and behavioural outcomes, which will increase an individual's  
286 risk of childlessness, but only in some cases result in a clinically-ascertainable condition.

287

288 When investigating sex-biased patterns of genetic associations for cognitive and behavioural  
289 traits, the potential contribution of reproductive success and mate choice ought to be  
290 considered. For example, it has been posited that the preferential transmission from mothers  
291 of inherited alleles increasing risk of neurodevelopmental disorders potentially relates to the  
292 greater 'resilience' of females to such alleles<sup>32</sup>. However, our findings that the impact on  
293 cognition of the damaging genetic variation studied here is similar between the sexes



294 suggests that mate choice may be a more plausible explanation for such observations, as  
295 seen for the 22q11.2 deletion<sup>32,33</sup>.

296

297 Our analyses have several limitations. First, we do not have longitudinal relationship data for  
298 UK Biobank participants that might shed more light on the impact of  $s_{\text{het}}$  burden on the ability  
299 to attract a partner during peak reproductive years. Second, we have not been able to  
300 explore the impact of  $s_{\text{het}}$  burden on the full range of cognitive and behavioural traits that  
301 relate to mate preferences and influence reproductive success. We anticipate that teasing  
302 out the relative contributions of correlated cognitive and behavioural traits will be  
303 challenging. Third, UK Biobank participants are biased towards higher health, educational  
304 attainment and socioeconomic status, and as such our estimates of the negative effect of  $s_{\text{het}}$   
305 burden on reproductive fitness possibly underestimate the true effects in the general  
306 population.

307

308 Our study focused on individuals of European ancestry and analogous studies across  
309 different populations and cultures are needed. Males have considerably greater variance in  
310 reproductive success than females across cultures<sup>34</sup>, including higher levels of childlessness  
311 than females<sup>21</sup>, highlighting the potential for sexual selection acting on male reproductive  
312 success to act across populations. We also note that many of the fundamental trends  
313 relating to mate preferences and male childlessness have been shown to be cross-cultural in  
314 nature<sup>15,20,34</sup>. We look forward to future studies that integrate genome-wide sequencing data  
315 on large population samples from a range of ancestries to more fully characterise the impact  
316 of sexual selection on our species.

317

318 Our study represents an important validation of the relevance of Darwin's theory of sexual  
319 selection<sup>6</sup> to contemporary human populations. Much recent evolutionary genetic research  
320 into selection on human cognitive traits has tended to focus on the fixation of alleles that  
321 increase brain size and complexity and thus evolutionary fitness<sup>20,35</sup>. Our work suggests a  
322 substantial role for purifying selection truncating the phenotypic distribution in the evolution  
323 of cognitive traits in humans. We contend that a full understanding of the evolution of human  
324 cognition will need to integrate patterns of both positive and negative selection.

## 325 Methods

### 326 Sample Selection and Phenotype Collation

327 To collate phenotypes for all individuals in UK Biobank, we downloaded bulk phenotype files  
328 from the UK Biobank data showcase (<https://www.ukbiobank.ac.uk/data-showcase/>; data  
329 acquired 22 Jan 2020). Due to ascertainment biases with post-recruitment data  
330 (Supplementary Figure 14), we only retained data which were ascertained at time of  
331 recruitment (i.e. instance 0 in the UK Biobank data showcase). Please see Supplementary  
332 Table 1 for detailed descriptions of all phenotypes assessed in this manuscript, including  
333 how they were processed, if applicable. Individuals with missing data for a relevant  
334 phenotype were excluded from analysis when testing that phenotype.

335

336 Following phenotype collation, we next selected for final analysis individuals of broadly  
337 European ancestry as determined by<sup>36</sup>, which left a total of 409,617 individuals. To identify  
338 and remove related individuals, we first downloaded the relatedness file from the UK  
339 Biobank data showcase using the ukbbgene tool, which contains 107,124 relatedness pairs  
340 among UK Biobank participants<sup>36</sup>. Next, we sorted individuals by the total number of related  
341 pairs within this file, and removed the individual with the most related pairs and recalculated  
342 the total number of relationships for all other individuals. We repeated this process until no  
343 related pairs remained, which left a total of 342,717 individuals for downstream analysis.

### 344 Calling, Quality Control, and Annotation of Copy Number

#### 345 Variants from SNP Microarrays

346 To ascertain copy number variants from 488,377 UK Biobank participants with available  
347 genetic data<sup>36</sup>, we utilized the PennCNV CNV-ascertainment pipeline<sup>37</sup>. Raw CEL files were  
348 downloaded in 107 independent batches, of which 95 batches were genotyped with the  
349 standard UK Biobank array platform and 12 batches were genotyped with the UKBiLEVE  
350 array platform. Each batch was then processed independently through the following calling  
351 pipeline: first, raw CEL files were genotyped with Affymetrix power tools  
352 (<http://media.affymetrix.com/support/developer/powertools/changelog/index.html>) 'genotype'  
353 with default settings. Next, using the 'generate\_affy-geno\_cluster.pl' and  
354 'normalize\_affy\_geno\_cluster.pl' scripts provided as part of PennCNV, genotyped samples  
355 within each batch were clustered and normalized, respectively. Normalized clustering output  
356 was then split into one file per individual and provided as input to 'detect\_cnv.pl' to generate  
357 an initial call set of CNVs. Finally, initial CNVs were then passed to the 'clean\_cnv.pl' script  
358 with "-fraction" set to 0.25 in order to merge nearby CNV calls in each individual. Following  
359 CNV calling, we dropped all individuals with  $\geq 20$  CNVs and absolute waviness factor  $> 0.3$ ,  
360 and all variants on either the X or Y chromosome, which left 485,593 individuals and  
361 3,070,510 raw redundant CNVs.

362

363 To perform quality control of ascertained CNVs, we developed a novel approach which uses  
364 individuals for which CNVs have been ascertained with both array and exome-based  
365 approaches. In short, we started with the basic logistic regression concept outlined in Mace  
366 et al.<sup>38</sup> but instead used the intersect of array- and WES-ascertained CNVs as the  
367 dependent variable in a random forest model<sup>39</sup>, with various per-individual and per-CNV  
368 metrics as predictors. To train this model, we utilized an additional set of 46,856 individuals  
369 collected as part of the INTERVAL study<sup>40</sup> genotyped on the same array as participants in  
370 UK Biobank, of which 4,465 also had matched WES data. For INTERVAL individuals, we  
371 performed array-based CNV calling identically to the method as described above and  
372 ascertained exome-based CNVs using three different algorithms with default settings:  
373XHMM<sup>41,42</sup>, CANOES<sup>43</sup>, and CLAMMS<sup>44</sup>. For each INTERVAL participant for which we had  
374 both array and exome-based CNVs, we then determined a "WES overlap score" as a  
375 product of the overlap of each array-based CNV with the three WES-based callers, corrected  
376 for whether or not any overlap was possible due to probe/exon bias. Scoring results in a  
377 roughly continuous metric for each array-ascertained CNV of between zero and three, where  
378 zero represents a lack of overlap with any WES CNV call and three represents a perfect  
379 overlap with all three algorithms. For predictor covariates, we used several metrics already  
380 shown to be of high quality for CNV quality control<sup>38,45</sup>, per-CNV metrics based on these (e.g.  
381 mean log R ratio for each probe within a CNV rather than for all probes across an entire  
382 individual), and a novel metric which uses specific probes on the array known to be biased  
383 for CNV calls on bad arrays (Supplementary Table 2; see code availability). To determine  
384 estimated sensitivity/specificity of our model we performed 10-fold cross-validation, where all  
385 array CNVs which overlapped at least two exons were split into equal test and training sets  
386 and provided, separately for deletions and duplications, as input into the randomForest  
387 implementation in R as a linear predictor with nTrees set to 500. To generate a call set of  
388 final quality controlled CNVs for downstream analyses, we then trained a final random forest  
389 using all INTERVAL individuals with matched array and WES data and generated predicted  
390 WES overlap scores for all 3,070,510 raw UK Biobank CNVs identified with PennCNV as  
391 described above. CNVs were then filtered based on a predicted sensitivity of 95% based on  
392 cross-validation, leaving a remaining 1,597,419 CNVs (1,036,930 deletions, 560,489  
393 duplications).

394

395 CNVs passing quality control were then provided as input to a custom java pipeline which  
396 merged all CNVs, regardless of whether they were deletions or duplications, based on 75%  
397 reciprocal overlap to generate a set of 171,118 nonredundant loci. Following filtering to  
398 342,717 unrelated individuals of broadly European ancestry for which CNV data was  
399 available, each locus was quantified for allele frequency. Loci were then assessed for  
400 overlap with a set of known pathogenic CNVs identically to Crawford, et al.<sup>45</sup> and annotated  
401 using Variant Effect Predictor (VEP) v97<sup>46</sup>. Only loci with an annotation of  
402 'transcript\_ablation' or 'feature\_truncation' and 'coding\_sequence\_variant' for deletions, and  
403 'transcript\_amplification' or 'feature\_elongation' and 'coding\_sequence\_variant' for  
404 duplications were considered to be affecting a target gene. A total of 1,109,051 redundant  
405 CNVs remained for downstream analysis following all filtering and annotation (717,420  
406 deletions, 391,631 duplications; Supplementary Figure 1).

## 407 Processing SNV/InDel Data from WES

408 To collate protein truncating, missense, and synonymous variants for all 49,960 individuals  
409 whole exome sequenced by UK Biobank, we downloaded the GRCh38-aligned  
410 population-level variant files from the UK Biobank (UK Biobank field 23160) and converted  
411 them to variant call format. All autosomal variants were then annotated with VEP v97<sup>46</sup>,  
412 CADDv1.5<sup>47</sup>, allele frequency from gnomAD<sup>48</sup>, PEXT<sup>49</sup> and, where relevant, MPC<sup>50</sup> and  
413 LOFTEE<sup>48</sup>. PEXT and MPC scores were converted from build37 to build38 using the  
414 CrossMap tool<sup>51</sup>. Variants were assigned to a gene based on the primary ENSEMBL  
415 transcript with the most severe consequence. Variants were considered to be PTVs if they  
416 were annotated by VEP as having a splice acceptor/donor, stop gained, or frameshift  
417 consequence. We then retained only variants with a gnomAD or UK Biobank-specific allele  
418 frequency  $\leq 1 \times 10^{-3}$  and with a PEXT mean cerebellum score  $> 0.1$ . Missense variants were  
419 only retained if they had MPC  $> 2$  and CADD  $> 25$ . PTVs were only retained if they were  
420 annotated by LOFTEE as high confidence, had CADD  $> 25$ , and were not located in the last  
421 exon or intron of the canonical transcript as annotated by ENSEMBL<sup>52</sup>. This filtering  
422 approach left a total of 2,658,431 redundant autosomal SNVs and InDels across all 34,812  
423 unrelated individuals of broadly European ancestry included in this study (Supplementary  
424 Figure 2).

425

426 It has recently been reported that the UK Biobank exome sequencing data is missing variant  
427 calls in regions where all reads were assigned MAPQ=0 (for more details, see Jia et al.<sup>53</sup>).  
428 While this issue affects 702 genes with an  $s_{\text{het}}$  value assessed in this study, genes with the  
429 highest constraint scores (i.e.  $s_{\text{het}} \geq 0.15$ ) are less likely to be affected by this problem (3.3%  
430 of genes with  $s_{\text{het}} \geq 0.15$ , 4.5% of genes with  $s_{\text{het}} < 0.15$ ; Fisher's  $p=0.02$ ). Secondly, this  
431 issue is consistent across all individuals with WES within the UK Biobank and thus results in  
432 a simple loss of power equivalent to having insufficient coverage to call variants across ~4%  
433 of the exome. Finally, as CNV calling was performed using genotyping arrays, and thus  
434 unaffected by issues with sequence alignment, our findings are independently robust.  
435 Information on exome capture baits and genes affected by alignment issues for producing  
436 this statement were acquired from the UK Biobank data showcase  
437 (<http://biobank.ctsu.ox.ac.uk/crystal/refer.cgi?id=1911>).

## 438 Calculating $s_{\text{het}}$ Burden for UK Biobank Participants

439 To calculate an individual's  $s_{\text{het}}$  burden, and assuming that fitness is multiplicative and that  
440 there is no epistasis between genes which are lost, we utilized the following formula:

$$441 \quad s_{\text{het}[i,v]} = 1 - \prod_g (1 - s_{\text{het}[i,v,g]})$$

442 where  $s_{\text{het}[i,v]}$  indicates individual  $i$ 's  $s_{\text{het}}$  burden for variant class  $v$  and  $s_{\text{het}[i,v,g]}$  indicates the  
443  $s_{\text{het}}$  score for gene  $g$  with a qualifying annotation for variant type  $v$  in individual  $i$ . Possible  
444 values for  $v$  are PTV, missense, synonymous, deletion, or duplication. As indicated by the  
445 formula above,  $s_{\text{het}}$  values were calculated independently for each variant type. Per-gene  $s_{\text{het}}$   
446 values were obtained from Weghorn et al.<sup>3</sup>, under their demographic model which includes

447 drift and scores for 16,189 protein coding genes which we were able to definitively map to an  
448 ENSEMBL gene ID.

449

450 To explore if genes known to be associated with male infertility were responsible for our  
451 observed effect on male reproductive success, we also generated individual  $s_{\text{het}}$  scores for  
452 each variant class excluding a set of 150 autosomal genes known to be associated with  
453 male infertility (Supplementary Table 4 from Oud et al.<sup>12</sup>). Genes with an annotation of  
454 limited, moderate, strong, or definitive evidence were excluded from calculated  $s_{\text{het}}$  scores.  
455

456 To test if our observed relationship was robust when excluding genes with a known disease  
457 annotation, we also generated individual  $s_{\text{het}}$  scores where we removed 4,414  
458 disease-associated genes. We considered a gene to be disease-associated based on being  
459 a confirmed or probable developmental disorder gene in the Developmental Disorders  
460 Genotype-Phenotype Database (DDG2P; <https://decipher.sanger.ac.uk/info/ddg2p>), in the  
461 Online Mendelian Inheritance in Man (OMIM; <https://omim.org/>) Morbid Map after excluding  
462 'non disease' and 'susceptibility to multifactorial disorder' entries, or in ClinVar<sup>54</sup> with a  
463 pathogenic/likely pathogenic variant linked to a phenotype.

## 464 Logistic and Linear Modelling of Phenotypes

465 To test the association of each  $s_{\text{het}}$  burden (i.e.  $s_{\text{het}[i,v]}$ ) per variant class with a given  
466 phenotype (e.g. those in Supplementary Table 1), we used a general linear model via the  
467 'glm' function in R of the form:

468

$$469 \text{phenotype} \sim s_{\text{het}[i,v]} + \text{age} + \text{age}^2 + PC1..PC10$$

470

471 All models were run separately for males and females. For binary phenotypes, 'family' was  
472 set to 'binomial' and for continuous phenotypes 'family' was set to 'gaussian'. To combine the  
473 effect sizes or log odds ratios for CNVs and PTVs (e.g. for Figure 1A), we used the  
474 'metagen' function from the 'meta' package<sup>55</sup> in R to perform a fixed-effects meta analysis.  
475 For logistic regression, we set parameters 'method.tau' to 'SJ' and 'sm' to 'OR'. For linear  
476 regression, we set the parameter 'sm' to "SMD". To avoid including an individual twice in our  
477 meta analysis, for samples with both CNV and PTV data available, we prioritized  
478 PTV-derived  $s_{\text{het}}$  scores.

479

480 When using raw variant counts as in Supplementary Figure 5, the  $s_{\text{het}}$  term in the above  
481 formula was changed to the total number of qualifying genes affected per individual, where  
482 qualifying genes were either those with  $pLI \geq 0.9$ <sup>48</sup> or those with  $s_{\text{het}} \geq 0.15$ <sup>3</sup>. Individuals with  
483 > 3 genes lost for deletions ( $pLI \geq 0.9$   $n = 42$ ;  $s_{\text{het}} \geq 0.15$   $n = 16$ ) and PTVs ( $pLI \geq 0.9$   $n = 2$ ;  
484  $s_{\text{het}} \geq 0.15$   $n = 1$ ) were removed prior to regression analyses.

485

486 To test the effect of individual phenotypes on likelihood of having children (Supplementary  
487 Figure 10), we used a general linear model in R with 'family' set to 'binomial' of the form:

488

$$489 \text{has.children} \sim \text{phenotype} + \text{age} + \text{age}^2 + PC1..PC10$$

490

491 As with estimating the contribution of  $s_{\text{het}}$  burden to phenotypes, all analyses were run  
492 separately for both males and females. For all models involving household income, we  
493 additionally included partner at home status as a covariate, as household income was  
494 recorded per household, not per recruited individual.

495

496 All odds ratios, effect sizes, standard errors, p values, and total individuals per association  
497 test reported in this manuscript can be found in Supplementary Table 3.

## 498 Evaluation of Gene Expression in Testis

499 To determine the expression in testis of all genes assessed in this study, we downloaded  
500 processed median transcripts per megabase values for all genes provided by v7 of the GTEx  
501 study

502 ([https://storage.googleapis.com/gtex\\_analysis\\_v8/rna\\_seq\\_data/GTEx\\_Analysis\\_2017-06-05\\_v8\\_RNASeQCv1.1.9\\_gene\\_median\\_tpm.gct.gz](https://storage.googleapis.com/gtex_analysis_v8/rna_seq_data/GTEx_Analysis_2017-06-05_v8_RNASeQCv1.1.9_gene_median_tpm.gct.gz)). Only genes for which an  $s_{\text{het}}$  score was  
504 available<sup>3</sup> were retained from this file. We then determined if each gene was affected by  
505 either a private deletion or PTV in a UK Biobank individual. We then plotted  $\log_e(\text{testis}$   
506 expression) as a factor of being a male infertility gene or not or having or not having a  
507 qualifying variant (Supplementary Figure 9). To determine significance we used a one-sided  
508 Wilcoxon test, with the alternate hypothesis that expression in testis of male infertility genes  
509 or genes with private variants is greater than the alternative set.

## 510 Modelling the Contribution of Phenotypes to Observed 511 Reduction in Fitness

### 512 Variant $s_{\text{het}}$ Burden

513 To estimate the contribution of  $s_{\text{het}}$  to overall fitness (Figure 3), we extracted log odds ratio  
514 estimates for the effect of  $s_{\text{het}}$  on having children from our logistic model and estimated the  
515 proportion of childless individuals at various  $s_{\text{het}}$  scores (0 to 1 at 0.1 intervals;  
516 Supplementary Figure 12). We then simulated 100,000 individuals at each  $s_{\text{het}}$  score for both  
517 males and females, with individuals randomly assigned as childless using the ‘rbinom’  
518 function in R. Childlessness at  $s_{\text{het}}=0$  was based on the overall mean childlessness for UK  
519 Biobank (males = 21.1%; females = 18.5%). As we have shown that  $s_{\text{het}}$  burden does not  
520 affect the number of children amongst individuals with children (Supplementary Figure 4),  
521 individuals simulated to have children were then assigned the mean number of children for  
522 individuals with children in the UK Biobank (2.23 children for males, 2.21 for females). We  
523 then averaged the number of children across all simulated individuals, regardless of  
524 simulated childlessness, to obtain an estimated overall fertility for each  $s_{\text{het}}$  score. Estimated  
525 mean fertility was then divided by the mean fertility for individuals in UK Biobank (1.76  
526 children for males, 1.80 for females) to determine an estimated reduction in fitness (Figure  
527 3). To calculate the error in our estimates, we used the 95% confidence intervals for the  $s_{\text{het}}$   
528 burden log odds ratio from our original logistic regression. Since expected fitness at  $s_{\text{het}} = 1$

529 is 0, the estimated percentage of reduced fitness at  $s_{\text{het}} = 1$  due to individual  $s_{\text{het}}$  burden is  
530 simply 1 - reduced fitness as calculated above.

## 531 General Cognition

532 When possible, we used independent estimates from population level or external data to  
533 alleviate biases in UK Biobank phenotype ascertainment (Supplementary Figure 14). As  
534 such, data on cognitive ability and fertility are collected from Swedish population level  
535 government administrative registers that have been linked to Swedish conscription  
536 registers<sup>56</sup>. To assess assignment into different branches of a universal conscription for  
537 Swedish men, the Swedish government included an extensive cognitive ability test which all  
538 men in Sweden had to take part in. Information on childbearing is based on birth records,  
539 and linkage to both men and women is nearly universal, partly due to universal government  
540 identity numbers, combined with serious paternity investigations in case of missing  
541 information of the biological father. This information was used to calculate reproductive  
542 fertility histories in 2012 for all men included in this study. We include data on all Swedish  
543 born men who participated in the military conscription test at age 18-20 who were born  
544 1965-1967. The conscription registers are described in more detail elsewhere<sup>26,57</sup>.

545

546 For the current study, we did not rely on the official cognitive ability scores assigned for each  
547 man following their cognitive ability test as in Kolk and Barclay<sup>58</sup>, but instead made manual  
548 calculations to create a more finely grained measure from raw test scores based on a battery  
549 of cognitive ability tests that are available for 3 years in our conscription registers. The  
550 Swedish military created an official IQ-measure based on a 9-score stanine scale that has  
551 been used in a large number of scientific studies<sup>58,59</sup>. In the current study we developed a  
552 more detailed score using information on the actual test scores of men participating in the  
553 test. The conscription test consisted of 4 large subtests measuring different dimensions of IQ  
554 with logical, spatial, verbal, and technical subtest<sup>57,60,61</sup>. To get a more finely tuned IQ  
555 measure than the official stanine measure we used the raw test scores of each of these four  
556 tests and summed the total number of correct questions for these 4-sub tests. Within each  
557 stanine IQ score, we then examined the distribution of test scores and after standardizing  
558 the test scores using only variation within each stanine score, calculated a new detailed IQ  
559 score. This procedure is done to anchor our new IQ measure in the official stanine IQ score.  
560 As our test scores have some missing values for men with very high and very low stanine  
561 scores, this procedure results in a slightly underdispersed distribution and our new calibrated  
562 IQ score has  $\mu = 100$  &  $\sigma = 12$ , as compared to the official stanine measure with  $\mu = 100$  &  $\sigma$   
563 = 15.

564

565 This score allows us to calculate cognitive ability by single digit IQ scores (Supplementary  
566 Table 4); however, as we had to rely on only observations with complete test scores for all  
567 test batteries, our data has a higher share of excluded men than the official cognitive ability  
568 scores (used by Kolk and Barclay<sup>26</sup> and others). In addition to the ~5% of men that did not  
569 take the test (e.g. they were ineligible for military service due to handicap such as visual  
570 impairments, that they were abroad, or were conscripted at an atypical age), we additionally  
571 excluded a number of men for which scores of all test batteries were not available. Our  
572 manually computed fine-grained measure was later standardized against the official

573 cognitive ability test score to maintain comparability and to assure our slightly smaller  
574 population is still representative of the complete cohort. Compared to most other measures  
575 of cognitive ability in the scientific literature, we argue that our population is unusually  
576 representative as little (indirect) pre-selection due to cognitive ability took place.

577

578 We first estimated the effect of overall  $s_{\text{het}}$  burden on fluid intelligence (Figure 2D) and,  
579 because fluid intelligence is normalized and IQ is normally distributed, converted this effect  
580 to a predicted change of IQ using the following formula:

$$581 \quad \Delta_{IQ} = \beta_{\text{fluid.intel}} * \sigma_{IQ}$$

582 Based on this formula, a male with an  $s_{\text{het}}$  burden of 1 would have a predicted mean change  
583 of -6.11 IQ points (Supplementary Figure 12). To then estimate childlessness and fertility for  
584 low IQ values not actually observed in the general population, we fit actual observations to a  
585 sigmoidal model using the function 'nls' in R (Supplementary Figure 13; Supplementary  
586 Table 4). We then simulated 100,000 individuals, with individual IQ values selected from our  
587 original Swedish IQ distribution ( $\mu = 100$ ,  $\sigma = 12$ ) with the mean shifted by the expected  
588 reduction in IQ as explained by our  $s_{\text{het}}$  model. We then matched simulated individuals IQ  
589 values to both fitted childlessness and fertility scores and calculated predicted fitness and  
590 childlessness as above for per-variant  $s_{\text{het}}$  burden (Supplementary Figure 12). Proportion of  
591 reduced reproductive success explained by IQ (and by extrapolation, other traits) is given by  
592 the formula:

$$593 \quad \frac{1 - \text{reduced.fitness}_{IQ}}{1 - \text{reduced.fitness}_{s_{\text{het}}}}$$

## 594 Mental Health Traits

595 As with general cognition, we used estimates from external studies to alleviate biases in UK  
596 Biobank phenotype ascertainment (Supplementary Figure 14). In this case, as we were  
597 unable to accurately estimate the increased risk of developing a mental health trait as a  
598 factor of individual  $s_{\text{het}}$  burden, we instead utilized odds ratios from Ganna et al.<sup>9</sup>. Only odds  
599 ratios for schizophrenia, autism spectrum disorder, and bipolar disorder were retained. As  
600 Ganna et al.<sup>9</sup> estimated the risk based on total count of high pLI ( $\geq 0.9$ )<sup>48</sup> genes with PTVs  
601 per individual, we assumed that an individual carrying one such variant had an  $s_{\text{het}}$  burden of  
602 0.162, or the mean of  $s_{\text{het}}$  value of all high pLI genes. We then converted this into a  
603 proportion of individuals with a given mental health trait,  $t$  at  $s_{\text{het}} x$  by scaling the odds ratio  
604 with the following formula:

$$605 \quad \log(OR_{s_{\text{het}}[x,t]}) = \frac{\log(OR_{\text{ganna}}) * s_{\text{het}}[x]}{0.162}$$

606 To establish a baseline expectation for the incidence of each mental health trait at  $s_{\text{het}} 0$  we  
607 utilized population-level data from Power et al.<sup>13</sup> and extrapolated the incidences for each  
608 trait at increasing  $s_{\text{het}}$  values (Supplementary Figure 12P, S-U). With our expected  
609 incidences, we then simulated 100,000 male and female individuals for each  $s_{\text{het}}$  value (0 to  
610 1, at 0.1 intervals), with individuals randomly assigned as having schizophrenia, autism, or  
611 bipolar disorder based on our calculated expected incidences. To generate an expected  
612 mean number of children for simulated individuals with mental health traits, we used fertility  
613 statistics generated by Power et al.<sup>13</sup>. As Power et al.<sup>13</sup> did not provide childlessness data,  
614 we were unable to generate expected childlessness as we did for other traits. Overall



615 predicted reduced fitness attributable to mental health and all values used for performing the  
616 above analyses are provided in Supplementary Table 5.

## 617 Partner at Home, Educational Attainment, and Household Income

618 To determine estimated reduced fitness explained by having a partner at home or  
619 educational attainment (Figure 2), we used the log odds ratio from our logistic regression on  
620 the effect of individual  $s_{\text{het}}$  burden for each phenotype (e.g. phenotype  $\sim s_{\text{het}}$ ) to estimate the  
621 mean expected value for each phenotype at various  $s_{\text{het}}$  burdens. We then used the logistic  
622 model for the effect of each phenotype on having children (e.g. having children  $\sim$  phenotype)  
623 to predict mean childlessness and overall reduced fitness through simulations as above  
624 (Supplementary Figure 12).

625

626 Due to the UK Biobank recording income in uneven bins and for the entire household rather  
627 than each participant, as well as the lack of studies exploring the relationship of rare variant  
628 burden with income (e.g. with mental health traits), we were unable to independently model  
629 the effect of income on overall fitness as we did for other traits.

## 630 Acknowledgements

631 We thank Leopold Parts, Molly Przeworski and George Davey-Smith for useful discussions  
632 and comments. We thank the INTERVAL study for sharing genotyping and exome data that  
633 allowed us to refine our CNV filtering methodology. This work has been funded by core  
634 Wellcome funding to the Wellcome Sanger Institute (grant WT098051). This work has been  
635 conducted using the UK Biobank Resource under application numbers 14421 (to G.K.) and  
636 44165 (to H.C.M.).

## 637 Author Contributions

638 E.J.G, M.D.C.N, and K.E.S. assessed the contribution of rare genetic variation to the  
639 phenotypes and vital statistics presented in this manuscript. E.J.G and G.K. performed CNV  
640 calling. E.J.G. and M.E.K.N. annotated and assessed SNV and InDel variants from provided  
641 WES data. K.B., M.K. E.J.G, and M.E.H. curated and analysed Swedish IQ data. E.J.G.,  
642 K.E.S., H.C.M. and M.E.H. designed experiments, oversaw the study and wrote the  
643 manuscript.

## 644 Data Availability

645 CNVs, SNVs and InDels included in this study will be returned to the UK Biobank following  
646 study publication, as per UK Biobank guidelines.

## 647 Code Availability

648 Code used as part of this project to perform phenotype testing, CNV calling, variant quality  
649 control, and generate all main text figures, supplementary figures and supplementary tables  
650 is available on github: <https://github.com/eugenegardner/UKBBFertility>.

## 651 References

- 652 1. Lek, M. *et al.* Analysis of protein-coding genetic variation in 60,706 humans. *Nature* **536**,  
653 285–291 (2016).
- 654 2. Collins, R. L. *et al.* An open resource of structural variation for medical and population  
655 genetics. *Genomics* (2019).
- 656 3. Weghorn, D. *et al.* Applicability of the Mutation-Selection Balance Model to Population  
657 Genetics of Heterozygous Protein-Truncating Variants in Humans. *Mol. Biol. Evol.* **36**,  
658 1701–1710 (2019).
- 659 4. Cassa, C. A. *et al.* Estimating the selective effects of heterozygous protein-truncating  
660 variants from human exome data. *Nat. Genet.* **49**, 806–810 (2017).
- 661 5. Ganna, A. *et al.* Ultra-rare disruptive and damaging mutations influence educational  
662 attainment in the general population. *Nat. Neurosci.* **19**, 1563–1565 (2016).
- 663 6. Darwin, C. The descent of man, and selection in relation to sex. By Charles Darwin.  
664 (1874) doi:10.5962/bhl.title.16749.
- 665 7. Männik, K. *et al.* Copy number variations and cognitive phenotypes in unselected  
666 populations. *JAMA* **313**, 2044–2054 (2015).
- 667 8. Huguet, G. *et al.* Measuring and Estimating the Effect Sizes of Copy Number Variants  
668 on General Intelligence in Community-Based Samples. *JAMA Psychiatry* **75**, 447–457  
669 (2018).
- 670 9. Ganna, A. *et al.* Quantifying the Impact of Rare and Ultra-rare Coding Variation across  
671 the Phenotypic Spectrum. *Am. J. Hum. Genet.* **102**, 1204–1211 (2018).

- 672 10. Sudlow, C. *et al.* UK biobank: an open access resource for identifying the causes of a  
673 wide range of complex diseases of middle and old age. *PLoS Med.* **12**, e1001779  
674 (2015).
- 675 11. Van Hout, C. V. *et al.* Whole exome sequencing and characterization of coding variation  
676 in 49,960 individuals in the UK Biobank. *bioRxiv* 572347 (2019) doi:10.1101/572347.
- 677 12. Oud, M. S. *et al.* A systematic review and standardized clinical validity assessment of  
678 male infertility genes. *Hum. Reprod.* **34**, 932–941 (2019).
- 679 13. Power, R. A. *et al.* Fecundity of patients with schizophrenia, autism, bipolar disorder,  
680 depression, anorexia nervosa, or substance abuse vs their unaffected siblings. *JAMA*  
681 *Psychiatry* **70**, 22–30 (2013).
- 682 14. Allen, M. S. The Role of Personality in Sexual and Reproductive Health. *Current*  
683 *Directions in Psychological Science* vol. 28 581–586 (2019).
- 684 15. Buss, D. M. *et al.* International Preferences in Selecting Mates: A Study of 37 Cultures.  
685 *J. Cross. Cult. Psychol.* **21**, 5–47 (1990).
- 686 16. Pawłowski, B. & Dunbar, R. I. Impact of market value on human mate choice decisions.  
687 *Proc. Biol. Sci.* **266**, 281–285 (1999).
- 688 17. Buss, D. M. Sex differences in human mate preferences: Evolutionary hypotheses  
689 tested in 37 cultures. *Behavioral and Brain Sciences* vol. 12 1–14 (1989).
- 690 18. Buss, D. M. & Schmitt, D. P. Mate Preferences and Their Behavioral Manifestations.  
691 *Annu. Rev. Psychol.* **70**, 77–110 (2019).
- 692 19. Fieder, M., Huber, S. & Bookstein, F. L. Socioeconomic status, marital status and  
693 childlessness in men and women: an analysis of census data from six countries. *J.*  
694 *Biosoc. Sci.* **43**, 619–635 (2011).
- 695 20. Nettle, D. & Pollet, T. V. Natural selection on male wealth in humans. *Am. Nat.* **172**,  
696 658–666 (2008).
- 697 21. Miettinen, A., Rotkirch, A., Szalma, I., Donno, A. & Tanturri, M.-L. *Increasing*

- 698 *childlessness in Europe: time trends and country differences*. (Family and Societies  
699 Working Paper 33, 2015).
- 700 22. Jalovaara, M. *et al.* Education, Gender, and Cohort Fertility in the Nordic Countries. *Eur.*  
701 *J. Popul.* **35**, 563–586 (2019).
- 702 23. Fieder, M. & Huber, S. The effects of sex and childlessness on the association between  
703 status and reproductive output in modern society. *Evolution and Human Behavior* vol. 28  
704 392–398 (2007).
- 705 24. Barthold, J. A., Myrskylä, M. & Jones, O. R. Childlessness drives the sex difference in  
706 the association between income and reproductive success of modern Europeans.  
707 *Evolution and Human Behavior* vol. 33 628–638 (2012).
- 708 25. Trivers, R. Parental Investment and Sexual Selection. in *Sexual selection and the*  
709 *descent of man* (ed. Campbell, B.) (Aldine, 1972).
- 710 26. Kolk, M. & Barclay, K. Cognitive ability and fertility among Swedish men born  
711 1951-1967: evidence from military conscription registers. *Proc. Biol. Sci.* **286**, 20190359  
712 (2019).
- 713 27. Kendall, K. M. *et al.* Cognitive Performance Among Carriers of Pathogenic Copy  
714 Number Variants: Analysis of 152,000 UK Biobank Subjects. *Biol. Psychiatry* **82**,  
715 103–110 (2017).
- 716 28. Davis, K. A. S. *et al.* Mental health in UK Biobank - development, implementation and  
717 results from an online questionnaire completed by 157 366 participants: a reanalysis.  
718 *BJPsych Open* **6**, e18 (2020).
- 719 29. Stefansson, H. *et al.* CNVs conferring risk of autism or schizophrenia affect cognition in  
720 controls. *Nature* vol. 505 361–366 (2014).
- 721 30. Fry, A. *et al.* Comparison of Sociodemographic and Health-Related Characteristics of  
722 UK Biobank Participants With Those of the General Population. *Am. J. Epidemiol.* **186**,  
723 1026–1034 (2017).

- 724 31. Kaplanis, J. *et al.* Integrating healthcare and research genetic data empowers the  
725 discovery of 28 novel developmental disorders. *bioRxiv* 797787 (2020)  
726 doi:10.1101/797787.
- 727 32. Girirajan, S. *et al.* Phenotypic heterogeneity of genomic disorders and rare copy-number  
728 variants. *N. Engl. J. Med.* **367**, 1321–1331 (2012).
- 729 33. Costain, G., Chow, E. W. C., Silversides, C. K. & Bassett, A. S. Sex differences in  
730 reproductive fitness contribute to preferential maternal transmission of 22q11.2  
731 deletions. *J. Med. Genet.* **48**, 819–824 (2011).
- 732 34. Betzig, L. Means, variances, and ranges in reproductive success: comparative  
733 evidence. *Evolution and Human Behavior* vol. 33 309–317 (2012).
- 734 35. Dennis, M. Y. & Eichler, E. E. Human adaptation and evolution by segmental duplication.  
735 *Curr. Opin. Genet. Dev.* **41**, 44–52 (2016).
- 736 36. Bycroft, C. *et al.* The UK Biobank resource with deep phenotyping and genomic data.  
737 *Nature* **562**, 203–209 (2018).
- 738 37. Wang, K. *et al.* PennCNV: an integrated hidden Markov model designed for  
739 high-resolution copy number variation detection in whole-genome SNP genotyping data.  
740 *Genome Res.* **17**, 1665–1674 (2007).
- 741 38. Macé, A. *et al.* New quality measure for SNP array based CNV detection. *Bioinformatics*  
742 **32**, 3298–3305 (2016).
- 743 39. Liaw, A. & Wiener, M. Classification and Regression by Randomforest. *R news* **2**, 285  
744 (2002).
- 745 40. Di Angelantonio, E. *et al.* Efficiency and safety of varying the frequency of whole blood  
746 donation (INTERVAL): a randomised trial of 45 000 donors. *Lancet* **390**, 2360–2371  
747 (2017).
- 748 41. Fromer, M. & Purcell, S. M. Using XHMM Software to Detect Copy Number Variation in  
749 Whole-Exome Sequencing Data. *Curr. Protoc. Hum. Genet.* **81**, 7.23.1–21 (2014).

- 750 42. Fromer, M. *et al.* Discovery and statistical genotyping of copy-number variation from  
751 whole-exome sequencing depth. *Am. J. Hum. Genet.* **91**, 597–607 (2012).
- 752 43. Backenroth, D. *et al.* CANOES: detecting rare copy number variants from whole exome  
753 sequencing data. *Nucleic Acids Res.* **42**, e97 (2014).
- 754 44. Packer, J. S. *et al.* CLAMMS: a scalable algorithm for calling common and rare copy  
755 number variants from exome sequencing data. *Bioinformatics* **32**, 133–135 (2016).
- 756 45. Crawford, K. *et al.* Medical consequences of pathogenic CNVs in adults: analysis of the  
757 UK Biobank. *J. Med. Genet.* **56**, 131–138 (2019).
- 758 46. McLaren, W. *et al.* The Ensembl Variant Effect Predictor. *Genome Biology* vol. 17  
759 (2016).
- 760 47. Rentzsch, P., Witten, D., Cooper, G. M., Shendure, J. & Kircher, M. CADD: predicting  
761 the deleteriousness of variants throughout the human genome. *Nucleic Acids Research*  
762 vol. 47 D886–D894 (2019).
- 763 48. Karczewski, K. J. *et al.* Variation across 141,456 human exomes and genomes reveals  
764 the spectrum of loss-of-function intolerance across human protein-coding genes.  
765 *Genomics* 677 (2019).
- 766 49. Cummings, B. B. *et al.* Transcript expression-aware annotation improves rare variant  
767 discovery and interpretation. (2019) doi:10.1101/554444.
- 768 50. Samocha, K. E. *et al.* Regional missense constraint improves variant deleteriousness  
769 prediction. (2017) doi:10.1101/148353.
- 770 51. Zhao, H. *et al.* CrossMap: a versatile tool for coordinate conversion between genome  
771 assemblies. *Bioinformatics* **30**, 1006–1007 (2014).
- 772 52. Kersey, P. J. *et al.* Ensembl Genomes 2016: more genomes, more complexity. *Nucleic*  
773 *Acids Res.* **44**, D574–80 (2016).
- 774 53. Jia, T., Munson, B., Lango Allen, H., Ideker, T. & Majithia, A. R. Thousands of missing  
775 variants in the UK Biobank are recoverable by genome realignment. *Ann. Hum. Genet.*

- 776 **84**, 214–220 (2020).
- 777 54. Landrum, M. J. *et al.* ClinVar: improving access to variant interpretations and supporting  
778 evidence. *Nucleic Acids Res.* **46**, D1062–D1067 (2018).
- 779 55. Balduzzi, S., Rücker, G. & Schwarzer, G. How to perform a meta-analysis with R: a  
780 practical tutorial. *Evid. Based. Ment. Health* **22**, 153–160 (2019).
- 781 56. Sweden, S. *Multi-generation register 2016: A description of contents and quality*.  
782 (Statistics Sweden, Population and Welfare Department, 2017).
- 783 57. Carlstedt, B. *Cognitive abilities - aspects of structure, process and measurement*.  
784 (University of Gothenburg, 2000).
- 785 58. Kolk, M. & Barclay, K. Cognitive ability and fertility among Swedish men born  
786 1951-1967: evidence from military conscription registers. *Proc. Biol. Sci.* **286**, 20190359  
787 (2019).
- 788 59. Hällsten, M. Inequality across three and four generations in Egalitarian Sweden: 1st and  
789 2nd cousin correlations in socio-economic outcomes. *Research in Social Stratification*  
790 *and Mobility* vol. 35 19–33 (2014).
- 791 60. Mårdberg, B. & Carlstedt, B. Swedish Enlistment Battery (SEB): Construct Validity and  
792 Latent Variable Estimation of Cognitive Abilities by the CAT–SEB. *International Journal*  
793 *of Selection and Assessment* vol. 6 107–114 (1998).
- 794 61. Rönnlund, M., Carlstedt, B., Blomstedt, Y., Nilsson, L.-G. & Weinehall, L. Secular trends  
795 in cognitive test performance: Swedish conscript data 1970–1993. *Intelligence* vol. 41  
796 19–24 (2013).
