# 1 Sex-biased reduction in reproductive success drives selective constraint on 2 human genes

3

4 Eugene J. Gardner<sup>1</sup>, Matthew D. C. Neville<sup>1</sup>, Kaitlin E. Samocha<sup>1</sup>, Kieron Barclay<sup>2,3,4</sup>, Martin  
5 Kolk<sup>3</sup>, Mari E. K. Niemi<sup>1</sup>, George Kirov<sup>5</sup>, Hilary C. Martin<sup>1</sup>, Matthew E. Hurles<sup>1,\*</sup>

6

7 <sup>1</sup>Wellcome Sanger Institute, Wellcome Genome Campus, Cambridge, Hinxton, United  
8 Kingdom

9 <sup>2</sup>Max Planck Institute for Demographic Research, Rostock, Germany

10 <sup>3</sup>Demography Unit, Department of Sociology, Stockholm University, Stockholm, Sweden

11 <sup>4</sup>Swedish Collegium for Advanced Study, Uppsala, Sweden

12 <sup>5</sup>Division of Psychological Medicine and Clinical Neurosciences, School of Medicine, Cardiff  
13 University, Cardiff, UK

14 \*meh@sanger.ac.uk

## 15 Summary

16 Genome-wide sequencing of human populations has revealed substantial variation among  
17 genes in the intensity of purifying selection acting on damaging genetic variants. While  
18 genes under the strongest selective constraint are highly enriched for Mendelian disorders,  
19 most of these genes are not associated with disease and therefore the nature of the  
20 selection acting on them is not known. Here we show that genetic variants that damage  
21 these genes reduce reproductive success substantially in males but much less so in  
22 females. We present evidence that this reduction is mediated primarily by cognitive and  
23 behavioural traits, which renders male carriers of such variants less likely to find mating  
24 partners. These findings represent strong genetic evidence that sexual selection mediated  
25 through female mate choice is shaping the gene pool of contemporary human populations.  
26 Furthermore, these results suggest that sexual selection accounts for 21% of purifying  
27 selection against heterozygous variants that ablate protein-coding genes.

## 28 Main text

29 The most damaging genetic variants, gene deletions and protein-truncating variants (PTVs),  
30 are removed from the population by selection with strength that varies substantially from  
31 gene to gene<sup>1,2</sup>. The strength of selection against heterozygous PTVs has been estimated by  
32 the selection coefficient,  $s_{\text{het}}$ , which exhibits a continuous spectrum across human genes<sup>3,4</sup>,  
33 although most attention has been focused on a subset of ~3,000 genes with the highest  
34 probability of Loss-of-function Intolerance (pLI)<sup>1</sup>.

35

36 The selection pressures acting on these most selectively constrained genes have not been  
37 fully characterised, but, *a priori*, could include natural selection against variants increasing  
38 pre-reproductive mortality or decreasing fertility, and sexual selection acting on mate choice  
39 or intra-sexual competition<sup>5</sup>. Gene deletions and PTVs in these genes have been shown to  
40 be associated with lower educational attainment<sup>6,7</sup> and general intelligence<sup>8</sup>, as well as  
41 increased risk of intellectual disability, and some psychiatric disorders<sup>9</sup>. Moreover, these

42 constrained genes are strongly enriched for dominant early-onset Mendelian diseases  
43 (including many neurodevelopmental disorders), many of which are associated with  
44 increased pre-reproductive mortality, indicating that natural selection likely makes a  
45 substantive contribution to this selective constraint. However, the majority (65%) of  
46 constrained genes ( $pLI > 0.9$ ) have not yet been associated with a Mendelian disease. This  
47 raises the fundamental question of whether natural selection represents the sole mechanism  
48 imposing this form of selective constraint on human genes, or whether other forms of  
49 selection are at work.

50

51 To explore the nature of selection acting on these genes we identified PTVs and genic  
52 deletions in the UK Biobank<sup>10</sup> comprising largely post-reproductive individuals (median age  
53 at recruitment: 58 years, range: 39-73 years, birth years: 1934-1970; Supplementary Figure  
54 1), and investigated the association with reproductive success. We called large copy number  
55 variants (deletions and duplications) from SNP genotyping array data on 340,925 unrelated  
56 participants of European ancestry (Supplementary Figure 2), and identified PTVs from  
57 exome sequencing among a subset of 34,812 participants (Supplementary Figure 3)<sup>11</sup>. For  
58 each participant, we then calculated the cumulative burden of private (only observed in one  
59 individual), heterozygous genic deletions and PTVs by combining  $s_{het}$  selection coefficients  
60 of each autosomal gene impacted by these variants (under the assumption that fitness is  
61 multiplicative, see Methods), which we term their  $s_{het}$  burden. The distribution of  $s_{het}$  burden  
62 was statistically indistinguishable between males and females: for participants with only  
63 genic deletion data available, 0.56% and 0.55% respectively had an  $s_{het}$  burden  $\geq 0.15$   
64 (Fisher's  $p=0.61$ ; Figure 1B), and for participants with both genic deletion and PTV data  
65 available the analogous proportions were 6.99% and 7.06% (Fisher's  $p=0.80$ ; Figure 1C).

66

67 We assessed the relationship between  $s_{het}$  burden and number of children, using a linear  
68 regression correcting for age and population structure (Methods; Supplementary Figure 4;  
69 Supplementary Table 1). We observed that an  $s_{het}$  burden of 1 is associated with a decrease  
70 in the overall total number of overall children for both males (0.53 fewer children [95% CI  
71 0.36-0.71],  $p=2.2 \times 10^{-9}$ ) and females (0.17 fewer children [95% CI 0.01-0.33],  $p=0.04$ ) when  
72 combining results from deletion and PTV-based analyses.

73

74 To determine if the observed effect of  $s_{het}$  burden was due to an actual reduction in overall  
75 number of children or a result of selection against having children at all, we performed two  
76 analyses. Firstly, we evaluated childlessness using logistic regression and again observed a  
77 striking sex difference in participants' probability of having any children given their  $s_{het}$   
78 burden, for both PTVs and genic deletions (Figure 1A). Combining the analyses of genic  
79 deletions and PTVs, we found that an  $s_{het}$  burden of 1 decreases the probability of males  
80 having any children (OR=0.29 [95% CI 0.21-0.40],  $p=9.0 \times 10^{-14}$ ) much more than females  
81 (OR=0.69 [95% CI 0.49-0.98],  $p=0.04$ ). We also observed that private duplications and likely  
82 damaging private missense variants exhibit similar but weaker effects on childlessness  
83 (Supplementary Figure 5). Secondly, if we remove childless individuals from the analysis,  $s_{het}$   
84 burden ceases to have a significant effect on the number of offspring, confirming that the  
85 observed decrease in reproductive success is determined largely by increased childlessness  
86 (Supplementary Figure 6).

87

88 We also considered whether ascertainment biases or differences in fertility between the UK  
89 Biobank population and the UK population as a whole could affect these results. As UK  
90 Biobank participants included in these analyses are biased towards females (54%), the  
91 observed sex bias is not due to having greater statistical power to detect an effect on  
92 reproductive success in males. Likewise, fertility rates between the UK Biobank population  
93 and the UK population as a whole are highly similar; the average total fertility rate in the UK  
94 from 1983-2000 (where data are available for both males and females), when UK Biobank  
95 participants would have been reproductively active, was 1.78 for males<sup>12</sup> and 1.76 for  
96 females<sup>13</sup>, which is very similar to that observed among UK Biobank participants (average  
97 number of children for males = 1.77; females = 1.80).

98

99 We observed consistent sex-bias in the association of  $s_{\text{het}}$  burden with childlessness when  
100 performing this analysis in different ways, including: (i) limiting analyses to carriers of private  
101 genic deletions or PTVs in the genes under most selective constraint (following thresholds  
102 set by their authors:  $pLI \geq 0.9$  or  $s_{\text{het}} \geq 0.15$ ; Supplementary Figure 7), (ii) extending analysis  
103 to more frequent, but still rare genic deletions and PTVs (Supplementary Figure 8), (iii)  
104 excluding genes known to cause Mendelian disorders (male OR=0.32 [95% CI 0.21-0.47],  
105  $p=2.1 \times 10^{-8}$ ), and (iv) restricting analysis to individuals in specific age ranges (Supplementary  
106 Figure 9).

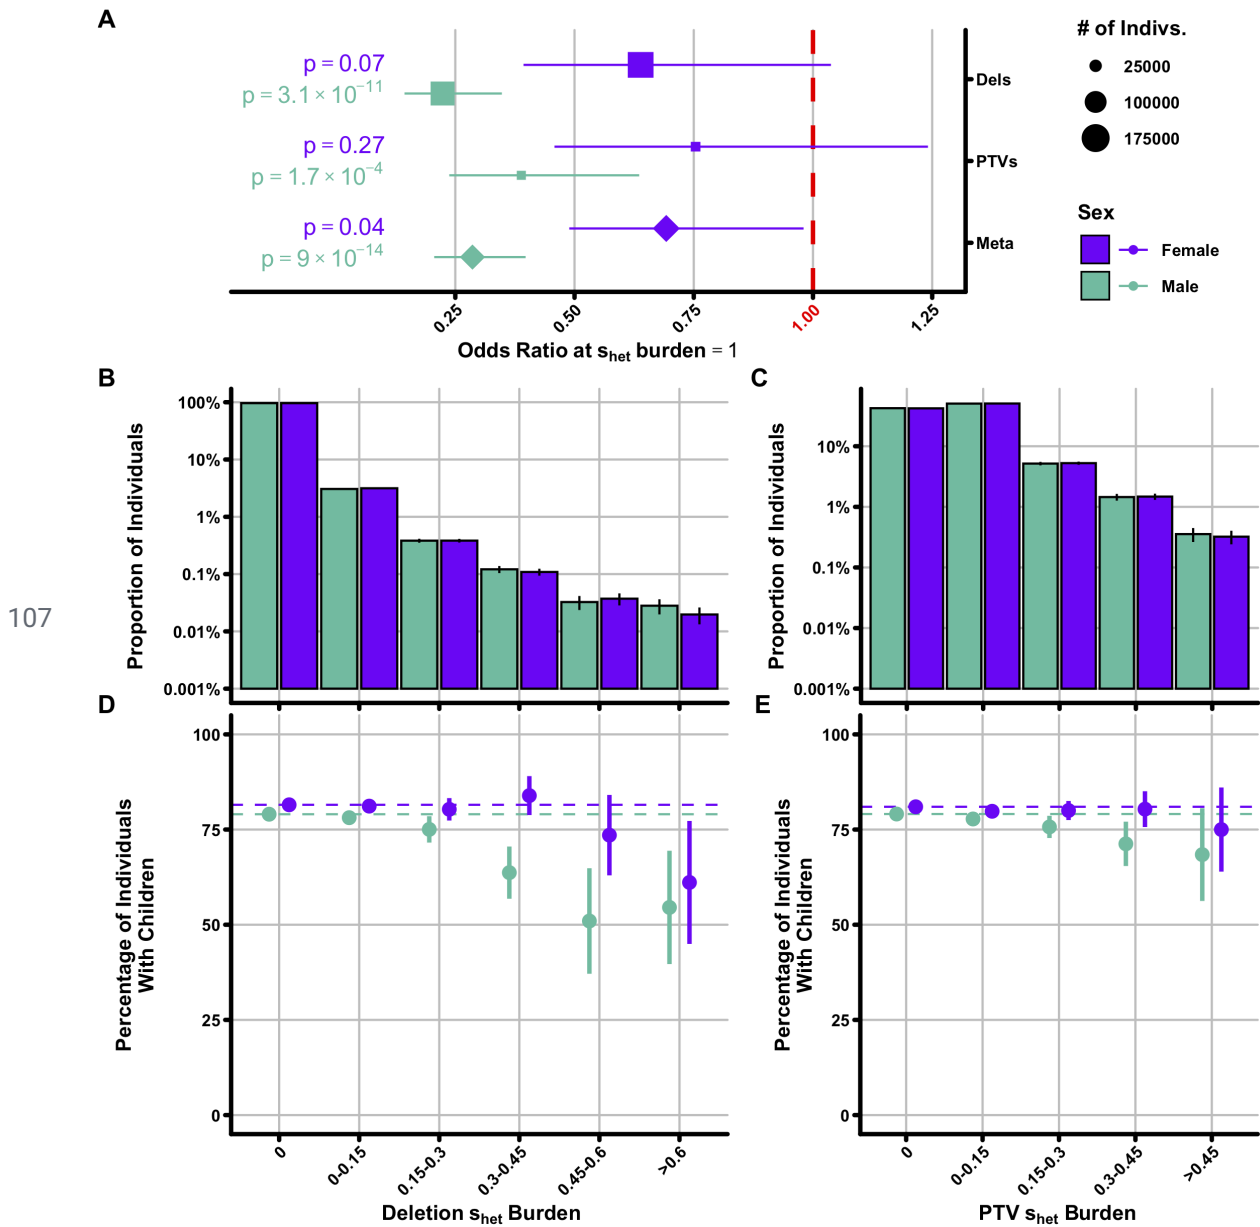

108 **Figure 1. Differences in male and female reproductive success as a function of cumulative rare**  
 109 **deleterious genetic variation.**

110 (A) Odds ratio estimates for the effect of cumulative deleterious variation for deletions, PTVs, and a  
 111 combined meta-analysis on childlessness separated for males (jade) and females (violet). Number of  
 112 individuals included in each analysis is indicated by the size of the point. (B; C) Proportion of  
 113 individuals in  $0.15 s_{het}$  bins for deletions (B) and PTVs (C). (D; E) Percentage of individuals with  
 114 children in bins based on  $s_{het}$  burden for deletions (D) and PTVs (E). All error bars are 95% confidence  
 115 intervals calculated on the population proportion.

116

117 We evaluated three hypotheses that could account for increased childlessness: (i) impaired  
 118 fertility (e.g. inability to produce viable gametes), (ii) adverse health conditions, and (iii)  
 119 cognitive and behavioural factors (which could decrease ability to find a mate, or increase  
 120 voluntary childlessness). We observed that  $s_{het}$  burden does increase the risk of male  
 121 infertility, albeit with wide confidence intervals, (OR=8.93 [95% CI 1.55-51.51],  $p=0.01$ ) but  
 122 not female infertility (OR=0.54 [95% CI 0.17-1.75],  $p=0.31$ ); however, three lines of evidence

123 suggest impaired fertility is not the predominant cause of the sex-biased association  
 124 between  $s_{het}$  burden and childlessness. First, when introducing male infertility status available  
 125 from combined health outcomes data for all UK Biobank participants (combined hospital  
 126 episode statistics, primary care records, self-reported conditions and death records) as a  
 127 covariate in the association testing, we observed minimal reduction in the strength of the  
 128 association between  $s_{het}$  burden and male childlessness (OR=0.29 [95% CI 0.21-0.40],  
 129  $p=1.5 \times 10^{-13}$ ; Supplementary Table 2). Second, we observed minimal change in the  
 130 association between  $s_{het}$  burden and male reproductive success after removing all 150  
 131 autosomal genes for which at least limited evidence exists of an association to male infertility  
 132 (OR=0.29 [95% CI 0.20-0.40],  $p=1.0 \times 10^{-13}$ )<sup>14</sup> or all 742 genes associated with male infertility  
 133 in mice (OR=0.29 [95% CI 0.20-0.40],  $p=6.8 \times 10^{-13}$ )<sup>15</sup>. Finally, genes under the highest  
 134 selective constraint ( $s_{het} \geq 0.15$ ) are not associated with higher expression levels in testis,  
 135 unlike the genes currently known to be associated with male infertility (Supplementary Figure  
 136 10). Together, these findings are consistent with a previous study that sought but did not find  
 137 a widespread role for highly-penetrant dominant deletions in spermatogenic failure<sup>16</sup>.  
 138

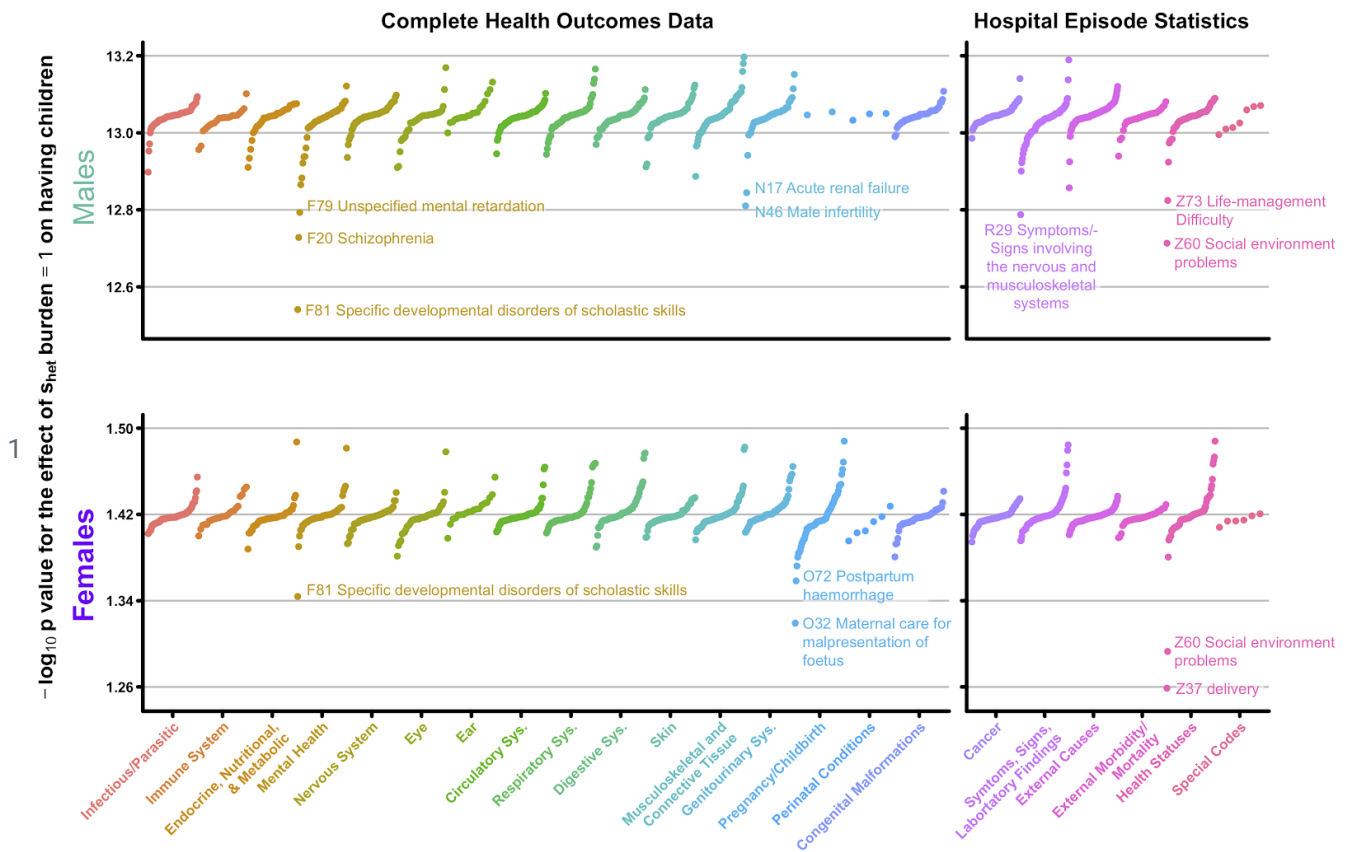

140 **Figure 2. Modulation of the relationship between  $s_{het}$  burden and childlessness by various**  
 141 **disorders.**

142 Plotted is the deletion and PTV meta-analysis  $-\log_{10}p$  value for the association between  $s_{het}$  burden  
 143 and having children, corrected by one of 1,294 ICD-10 codes from a combination of general  
 144 practitioner, hospital episode records, and self-reported conditions (left) or hospital episode records  
 145 alone (right) separately for males (top) and females (bottom). Results are ordered first by ICD-10  
 146 chapter (x-axis) and then by increasing  $-\log_{10}p$  value (y-axis). Visual outliers are labelled.  
 147

148 Previous studies have shown that a variety of physical birth defects are associated with  
149 reduced reproductive success<sup>17,18</sup>. We comprehensively assessed whether any adverse  
150 health conditions contributed to the association between  $s_{\text{het}}$  burden and childlessness. We  
151 independently tested 19,154 ICD-10 codes (from both hospital episode statistics and  
152 combined health outcomes data across four levels of the ICD-10 hierarchy; Methods) as a  
153 covariate in the association test of  $s_{\text{het}}$  burden on childlessness (Figure 2; Supplementary  
154 Figures 11-13; Supplementary Table 2; Methods). We found that while many ICD-10 codes  
155 are associated with having children, in particular positive associations with male-specific  
156 codes for elective sterilisation and female-specific codes associated with pregnancy and  
157 childbirth (Supplementary Figure 11), correcting for any ICD-10 code had minimal impact on  
158 the strength of association between  $s_{\text{het}}$  burden and childlessness (Figure 2; Supplementary  
159 Figures 12, 13). The biggest impact on the association of  $s_{\text{het}}$  burden and male childlessness  
160 was observed for ‘developmental disorders of scholastic skills’, although this only modestly  
161 reduced the significance of the association from  $p=9.0 \times 10^{-14}$  to  $p=2.9 \times 10^{-13}$  (Figure 2;  
162 Supplementary Table 2). In addition to diseases, clinically annotated ICD-10 codes are also  
163 available for a range of factors denoting health status and contact with health services  
164 (Chapter XXI – Health Statuses). We noted that two of these also had a modest impact on  
165 the association of  $s_{\text{het}}$  burden and male childlessness when included as covariates in  
166 association testing (Figure 2; Supplementary Table 2). These were codes relating to life  
167 management difficulty (code Z73) and social environment problems (code Z60), with the  
168 latter driven primarily by the status of living alone (code Z60.2). Both of these two  
169 health-related factors are positively associated with  $s_{\text{het}}$  burden.

170

171 There is substantial existing evidence that behavioural and cognitive traits influence  
172 reproductive success in a sex-biased manner. First, the reduced reproductive success  
173 associated with a range of psychiatric disorders is much more pronounced in males than in  
174 females<sup>19</sup>. Second, personality traits associated with increased reproductive success differ  
175 between males and females, with increased extraversion in males but greater neuroticism in  
176 females being linked to increased reproductive success<sup>20</sup>. Third, although the most highly  
177 ranked mate characteristics are highly concordant between the sexes<sup>21</sup>, some mate  
178 preferences differ between the sexes, with males placing greater value on physical  
179 attractiveness and females valuing cues relating to earning potential<sup>20-23</sup>. Finally, low  
180 socioeconomic status and low educational attainment have been more strongly linked to  
181 increased childlessness in males than females across populations<sup>24-27</sup>. This has typically  
182 been ascribed to males of lower socioeconomic status finding it harder to attract a  
183 partner<sup>28,29</sup>.

184

185 Some of these observations about sex-biased reproductive success have been related to  
186 sexual selection by mate choice, in which one sex (typically female) tends to be more  
187 discriminating in their choice of mates. Alternative theories have been proposed regarding  
188 the causes of sexual selection, including those that focus on disparities in gamete size  
189 (Darwin-Bateman paradigm<sup>30</sup>) and others that focus on differential parental investment<sup>31</sup>.  
190 This latter hypothesis posits that sexual selection by mate choice is driven, in large part, by  
191 the sex that invests more in offspring (typically female) being more discriminating in their  
192 choice of mates, especially with regard to their potential to invest in offspring. However, a  
193 sex-biased reduction in reproductive success need not be caused by sex differences in mate

194 preferences. Sex-biased reproductive success could also result from a sex bias in trait  
195 severity coupled to mate choice preferences that are not sex-biased. These mechanisms are  
196 not mutually exclusive; both could be contributing to an overall sex-biased reduction in  
197 reproductive success, albeit on different traits.

198

199 A key prediction of the hypothesis that differential mate choice underpins the observation of  
200 a male-biased association of  $s_{\text{het}}$  burden with increased childlessness is that males with a  
201 high  $s_{\text{het}}$  burden should find it harder to find mates than females. We observed that UK  
202 Biobank participants with high  $s_{\text{het}}$  burden were significantly less likely to have reported  
203 currently living with a partner (at the time of assessment), consistent with the findings from  
204 the ICD10 codes, and that, like reproductive success, this effect was significantly stronger in  
205 males than in females (Figure 3A). UK Biobank males currently living with a partner are also  
206 much more likely to have children (OR=5.80 [95% CI 5.65-5.96],  $p < 1 \times 10^{-100}$ ;  
207 Supplementary Figure 14). We note that the status of currently living with a partner is an  
208 imperfect proxy for partner status during peak reproductive years, but the latter information is  
209 not currently available in UK Biobank. We also found that  $s_{\text{het}}$  burden was significantly  
210 positively associated with reporting never having had sex for both male (OR=0.07 [95% CI  
211 0.03-0.20],  $p=4.3 \times 10^{-07}$ ) and female (OR=0.18 [95% CI 0.05-0.61],  $p=5.8 \times 10^{-03}$ ) UK Biobank  
212 participants, without significant sex-bias (Figure 3B). Additionally, while same sex sexual  
213 behaviour is strongly associated with increased childlessness in UK Biobank (male OR=0.14  
214 [95% CI 0.13-0.15],  $p < 1 \times 10^{-100}$ ; female OR=0.27 [95% CI 0.25-0.29]  $p < 1 \times 10^{-100}$ ;  
215 Supplementary Figure 14), we observed no significant impact of  $s_{\text{het}}$  burden on the likelihood  
216 of having engaged in same sex sexual behaviour among males (OR=1.27 [95% CI  
217 0.59-2.69],  $p=0.54$ ; Supplementary Figure 15) nor did we observe any change in the  
218 relationship between  $s_{\text{het}}$  burden and childlessness when excluding individuals who engaged  
219 in same-sex sexual behaviour from our primary model (OR=0.27 [95% CI 0.19-0.39],  
220  $p=1.2 \times 10^{-13}$ ).

221

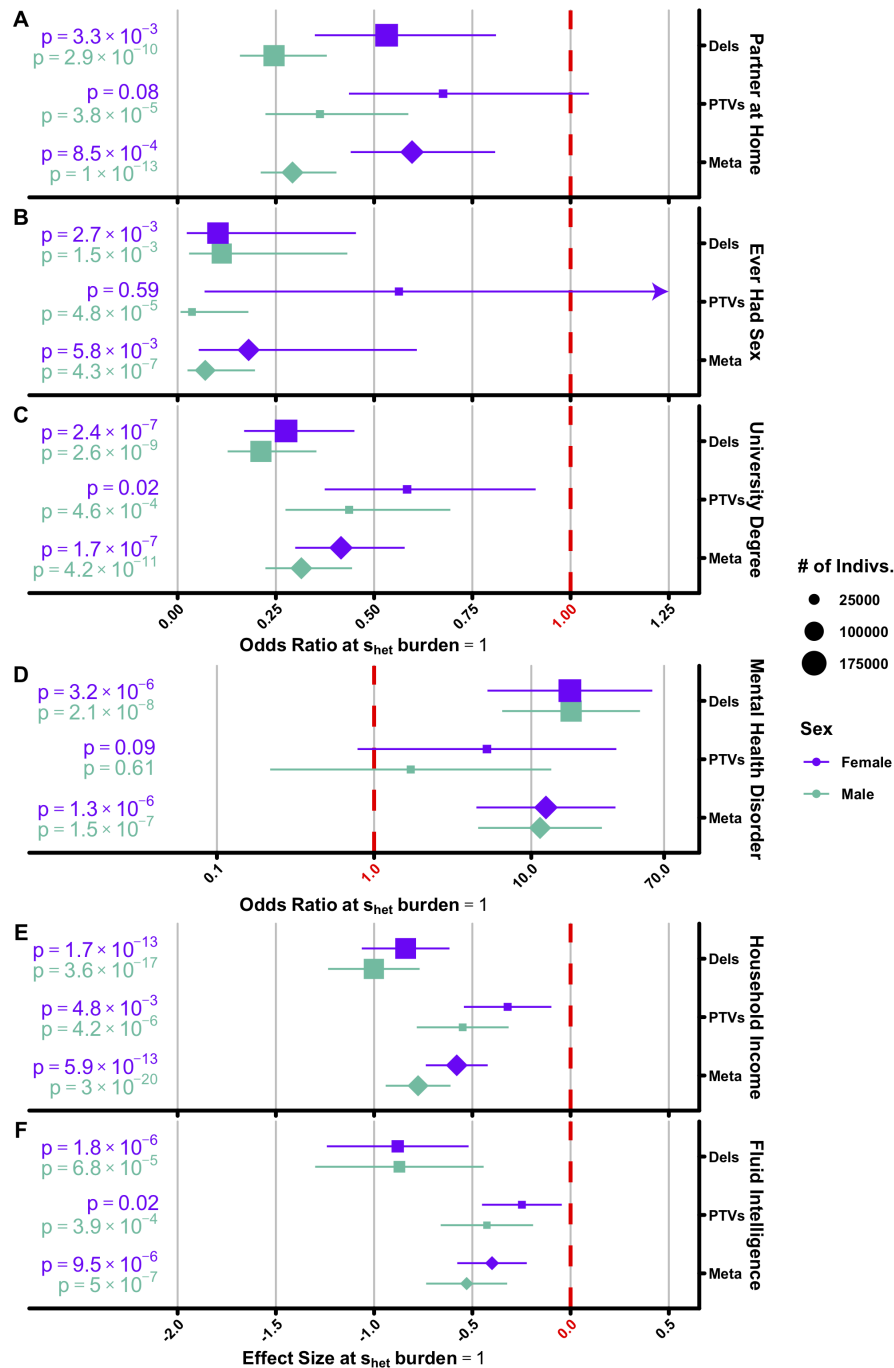

222 **Figure 3. Effect of  $s_{het}$  burden on traits known to be associated with reproductive success.**  
 223 Shown are similar plots to Figure 1A, except for six phenotypes which have been previously  
 224 associated with reproductive success: (A) having a partner at home, (B) ever having engaged in  
 225 sexual intercourse, (C) educational attainment as measured by having a university degree, (D)  
 226 household income (as measured by income bracket and corrected for having a partner at home; see  
 227 methods), (E) fluid intelligence (in standard deviations), and (F) having a mental health disorder. For  
 228 each trait, we tested using a logistic (A,B,C,D) or linear (E,F) model the effect of  $s_{het}$  burden on each  
 229 phenotype shown above, corrected for age, age<sup>2</sup>, and the first thirty ancestry principal components.  
 230 The arrow in plot (B) indicates the upper confidence interval for female PTVs is outside the range of  
 231 the X-axis. Note that plot (D) is in log rather than linear scale.  
 232



233 We explored in UK Biobank whether the impact of  $s_{\text{het}}$  burden on reproductive success might  
234 plausibly be mediated through some of the specific factors highlighted by the previous  
235 psychiatric, demographic and psychosocial research summarised above. Firstly we  
236 investigated the impact of  $s_{\text{het}}$  burden on cognition as measured by fluid intelligence in  
237 110,190 (51,378 males, 58,812 females) UK Biobank participants. We found that  $s_{\text{het}}$  burden  
238 was associated with significantly reduced fluid intelligence scores of males and females with  
239 similar effect sizes (Figure 3F). Increasing  $s_{\text{het}}$  burden is also associated with lower  
240 educational attainment and household income (Figure 3C,E), again with similar effect sizes  
241 in males and females. To evaluate the potential impact of this reduced cognition on male  
242 reproductive success, we extended previously published work relating the results of IQ tests  
243 taken by 95% of Swedish males (during military conscription) to their completed family  
244 size<sup>32</sup>. We estimated that the decrement in cognition observed in UK Biobank males could  
245 account for 6% [95% CI 5%-9%] of the reduced male reproductive success associated with  
246 high  $s_{\text{het}}$  burden (Supplementary Figure 16, Methods). We also note that the decrease of  
247 reproductive success with decreasing IQ was most pronounced in males with IQ<70  
248 (Supplementary Figure 17)<sup>32</sup>, who are likely depleted in UK Biobank relative to the general  
249 population.

250

251 Analysis of psychiatric disorders in UK Biobank is complicated by both recruitment bias away  
252 from more severe psychiatric disorders and incomplete data on participants<sup>10,33-35</sup>. The most  
253 comprehensive data are available on a subset of UK Biobank individuals from a mental  
254 health questionnaire for which participants were invited by email ( $n = 157,366$ )<sup>34</sup>. We  
255 observed that a high  $s_{\text{het}}$  burden was very strongly associated with not having an email  
256 address (male OR=0.30 [95% CI 0.21-0.41],  $p=8.4 \times 10^{-14}$ ; female OR=0.48 [95% CI  
257 0.35-0.65],  $p=3.1 \times 10^{-6}$ ; Supplementary Figure 18), which likely explains why individuals with  
258 a high  $s_{\text{het}}$  burden were much less likely to complete the questionnaire (male OR=0.43 [95%  
259 CI 0.31-0.60],  $p=7.6 \times 10^{-7}$ ; female OR=0.41 [95% CI 0.30-0.56],  $p=1.7 \times 10^{-8}$ ; Supplementary  
260 Figure 18). Therefore we focused analyses of mental health disorders on the complete  
261 health outcomes data available for all participants. These data corroborate a previous  
262 finding<sup>9</sup> that high  $s_{\text{het}}$  burden increases the risk of psychiatric disorders previously associated  
263 with reduced reproductive success (intellectual disability, schizophrenia, autism, attention  
264 deficit hyperactive disorder, and bipolar disorder; Figure 3D, Supplementary Figure 19)<sup>19</sup>,  
265 and that these psychiatric disorders are associated with increased childlessness in both  
266 male (OR=0.35 [95% CI 0.32-0.39],  $p=8.3 \times 10^{-85}$ ) and female (OR=0.58 [95% CI 0.52-0.65],  
267  $p=2.7 \times 10^{-19}$ ) UK Biobank participants, albeit with substantial sex-bias (Supplementary Figure  
268 14). This finding accords with a previous study showing that copy number variants  
269 associated with increased risk of schizophrenia are also associated with disproportionately  
270 reduced reproductive success in males<sup>36</sup>. Carriers of well-characterised neurodevelopmental  
271 disorder-associated copy number variants, which include those with a strong association to  
272 schizophrenia (Methods), only account for 3.7% ( $n = 12,608$ ) of individuals in UK Biobank.  
273 Removal of these individuals from the dataset does not significantly alter the association of  
274  $s_{\text{het}}$  burden with reduced male reproductive success (OR=0.29 [95% CI 0.21-0.41],  
275  $p=3.1 \times 10^{-12}$ ).

276

277 We subsequently tested the impact of  $s_{\text{het}}$  burden on childlessness only for individuals  
278 without any evidence of a mental health disorder associated with reduced reproductive

279 success (from hospital episode statistics, combined health outcomes data, or the mental  
280 health questionnaire). We observed very similar effect sizes to when analysing all individuals  
281 (male OR=0.31 [95% CI 0.22-0.43],  $p=1.0 \times 10^{-11}$ ; female OR=0.75 [95% CI 0.53-1.07],  
282  $p=0.12$ ), suggesting that the effect on childlessness is not predominantly driven by this  
283 subset of mental health disorders. We explored this further, using data external to UK  
284 Biobank that are less affected by the limitations described above. Using previous estimates  
285 of the increased risk of mental health disorders caused by PTVs in highly constrained  
286 genes<sup>9</sup>, and the reduced reproductive success associated with those disorders<sup>19</sup>, we  
287 estimated that these mental health disorders could account for 15% [7 - 33%] of the reduced  
288 male reproductive success associated with high  $s_{\text{het}}$  burden (Methods). Thus, in UK Biobank,  
289 both reduced fluid intelligence and increased risk of psychiatric disorders account for only  
290 modest proportions of increased male childlessness due to  $s_{\text{het}}$  burden.

291

292 We next used multiple regression to explore how much of the association between  $s_{\text{het}}$   
293 burden and childlessness can be accounted for by the factors described above (where  
294 available for the entire cohort), namely: living with a partner, having had sex, having a mental  
295 health disorder associated with reduced reproductive success, having a university degree  
296 and having an infertility code in health records. Collectively, these factors can account for  
297 most of the association of  $s_{\text{het}}$  burden and childlessness in both males (75%) and females  
298 (65%), as assessed by the difference in incremental Nagelkerke's  $r^2$  of deletion  $s_{\text{het}}$  burden  
299 between models (Methods; Figure 4A; Supplementary Figure 20). By far the biggest  
300 contribution comes from living with a partner and having had sex, which together can  
301 account for 73% of the association in males.

302

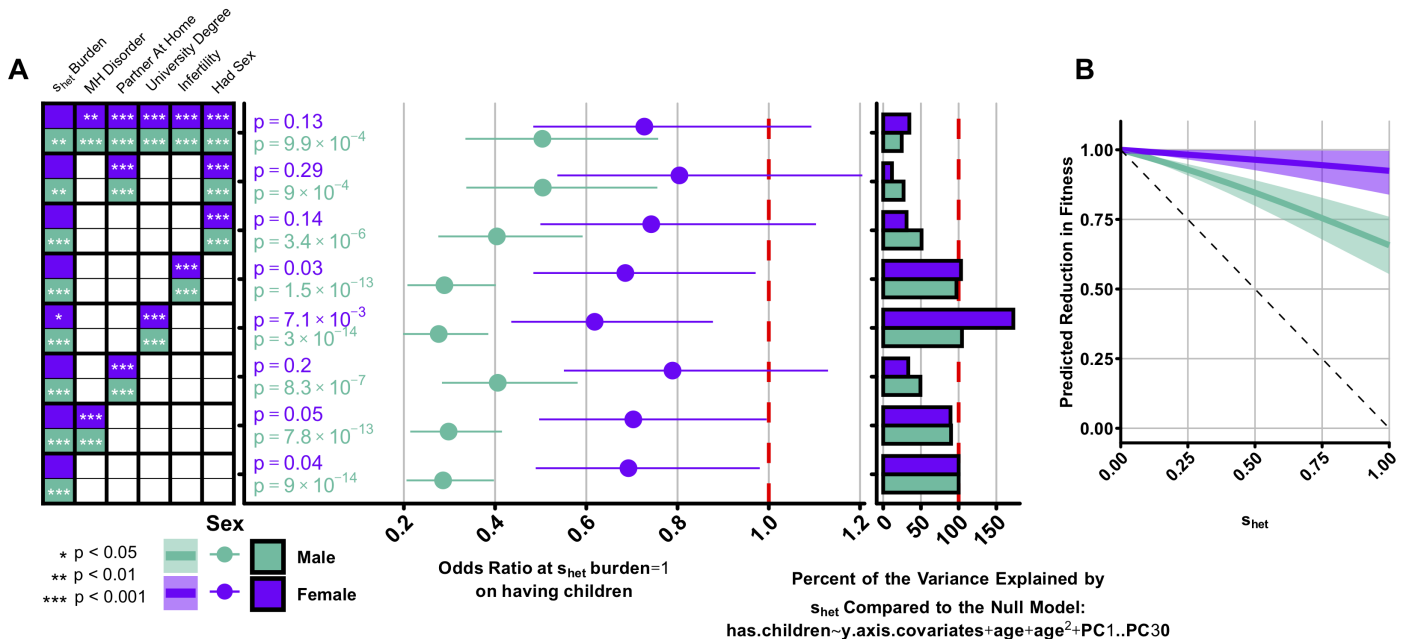

304 **Figure 4. The role of individual phenotypes in the relationship between  $s_{het}$  burden and fitness.**

305 (A) Odds ratio estimates for the effect of cumulative deleterious variation for a combined  
 306 meta-analysis (deletions + PTVs) on childlessness (middle), corrected for a combination of whether or  
 307 not a study participant has a mental health disorder, a partner at home, a university degree, infertility,  
 308 or ever had sex; traits included in each model are indicated as coloured boxes (males – jade, females  
 309 – violet) on the y-axis. Stars within boxes indicate significance level with childlessness for each  
 310 covariate independently when correcting for deletion  $s_{het}$  burden. For all possible combinations of  
 311 these traits, see Supplementary Figure 20. As indicated by coloured boxes, all models include  $s_{het}$   
 312 burden and were run separately for males (jade) and females (violet). The marginal bar plot to the  
 313 right gives the proportion of the variance in childlessness explained by  $s_{het}$  burden as calculated for  
 314 deletions only, scaled to the model which only includes  $s_{het}$  burden (i.e. the model on the bottom of the  
 315 plot). (B) Predicted reduction in overall fitness as a factor of individual  $s_{het}$  burden. Displayed is the  
 316 expected reduction in fitness as a factor of increasing  $s_{het}$  burden, independently for each sex. Error is  
 317 shown as the lighter shaded area surrounding the trend line, and is based on the confidence intervals  
 318 on the odds ratio as determined by our logistic regression model (Figure 1A; Methods). The dashed  
 319 line represents the theoretical reduction in fertility as predicted by  $s_{het}^3$ .  
 320

321 Overall, we estimate that reduced reproductive success due to  $s_{het}$  burden explains 21%  
 322 [12-30%] (Figure 4B; Supplementary Figure 21) of the total reduction in fitness expected due  
 323 to purifying selection against PTVs as predicted by  $s_{het}$  (Methods)<sup>3</sup>, with this reduction in  
 324 fitness being much stronger in males. This suggests that such selection may not be borne  
 325 equally by males and females. We note that the total reduction in fitness predicted by  $s_{het}$  will  
 326 include a substantive contribution from pre-reproductive mortality, which is not quantified  
 327 here. We also note that current estimates of  $s_{het}$  are based on data from aggregated  
 328 research cohorts, and may thus be biased upwards. This is because individuals with high  $s_{het}$   
 329 burden are likely to be under-represented within research cohorts (since participation in  
 330 research has been shown to be biased with respect to gender, socioeconomic status and  
 331 genetic variation<sup>37</sup>), so PTVs within genes under strong selective constraint may well be  
 332 segregating at higher frequencies in the general population than in research cohorts. This  
 333 bias could result in the true value of  $s_{het}$  being lower than currently estimated, and,

334 consequently, the contribution of reduced reproductive success to the overall reduction in  
335 fitness due to purifying selection being greater than estimated here.

336

337 These estimates of reproductive success and selection coefficients are inevitably reflective  
338 of a population at a particular point in time. The proportionate contribution of reduced  
339 reproductive success to the overall reduction in fitness associated with genic purifying  
340 selection is likely to change over time. Medical advances over recent decades have altered  
341 the landscape of infertility and pre-reproductive mortality substantially. Moreover, overall  
342 childlessness is highly dynamic over time. Demographic data demonstrate that  
343 population-wide childlessness can double in just two decades, a nationwide trend that is  
344 readily apparent in UK Biobank (Supplementary Figure 1). We cannot discount that  
345 sex-biased sociodemographic factors, in addition to sexual selection, could also be  
346 contributing to dampening the apparent association between  $s_{\text{het}}$  burden and childlessness in  
347 women. Higher educational attainment has been shown to be one of the factors most  
348 strongly positively associated with childlessness in a female-biased manner<sup>26</sup>. Indeed, when  
349 we correct the association between  $s_{\text{het}}$  burden and childlessness for having a university  
350 degree, we see a more significant effect of  $s_{\text{het}}$  burden on childlessness in females (OR=0.62  
351 [95% CI 0.44-0.88],  $p=7.1 \times 10^{-3}$ ; Figure 4A; Supplementary Figure 20); but the effect on male  
352 childlessness remains considerably stronger than in females.

353

354 In summary, we find that reduced reproductive success, especially in males, makes a  
355 substantial contribution to purifying selection acting on human genes, and that this is likely  
356 mediated primarily by mate choice on cognitive and behavioural traits. Mate preferences are  
357 multi-dimensional, and vary across cultures and time<sup>23</sup>. It is likely that male-biased reduced  
358 reproductive success associated with increased  $s_{\text{het}}$  burden involves multiple cognitive and  
359 behavioural traits. The negative impact of  $s_{\text{het}}$  burden on fluid intelligence, household income  
360 and educational attainment, together with the previously documented female-biased  
361 preference for mates with good financial prospects<sup>21</sup> suggest that sex-biased mate  
362 preferences contribute in part to the sex-bias in reproductive success with increased  $s_{\text{het}}$   
363 burden. However, as we are not able to assess the effect of  $s_{\text{het}}$  burden on all characteristics  
364 that are valued in a mate, especially those that are ranked most highly by both sexes (e.g.  
365 emotional stability and maturity)<sup>21</sup>, we cannot exclude the possibility that sex biases in the  
366 impact of  $s_{\text{het}}$  burden on these traits also contribute to the sex bias in reproductive success.  
367 Nonetheless, this study represents an important validation of the relevance of Darwin's  
368 theory of sexual selection<sup>5</sup> to contemporary human populations.

369

370 We note that while this study demonstrates that rare heterozygous genetic variation has a  
371 bigger impact on reproductive success in males than females, heritability analyses have  
372 suggested a greater contribution of common genetic variation to variance in reproductive  
373 success in females than males<sup>38</sup>. These two observations are potentially complementary: the  
374 larger contribution of heterozygous rare genetic variation to male reproductive success could  
375 be lowering the proportionate contribution of common genetic variation. Previous work  
376 demonstrated that the proportion of the genome that is homozygous is also associated with  
377 decreased reproductive success through increased childlessness, although without an  
378 apparent sex-bias, and proposed that this association is largely driven by rare homozygous  
379 variation, which we did not assess here<sup>39</sup>. Involuntary childlessness can have serious

380 consequences for mental health, and further studies of the genetic contributions to  
381 involuntary childlessness are warranted.

382

383 These findings may help to explain, at least in part, why only a minority of genes under the  
384 highest selective constraint have been associated with single gene disorders that increase  
385 pre-reproductive mortality or cause infertility. While there are clearly many more single gene  
386 disorders to be discovered among these genes<sup>40,41</sup>, we anticipate that these highly  
387 constrained genes will not be neatly divided into those that cause single gene disorders and  
388 those that impact on reproductive success without causing a clinical condition. Rather, we  
389 predict that damaging variants in many of these genes will perturb neurodevelopment  
390 resulting in a broad spectrum of cognitive and behavioural outcomes, which will increase an  
391 individual's risk of childlessness, but only in some cases result in a clinically-ascertainable  
392 condition.

393

394 When investigating sex-biased patterns of genetic associations for cognitive and behavioural  
395 traits, the potential contribution of reproductive success and mate choice ought to be  
396 considered. For example, it has been posited that the preferential transmission from mothers  
397 of inherited alleles increasing risk of neurodevelopmental disorders potentially relates to the  
398 greater 'resilience' of females to such alleles<sup>42</sup>. However, our findings that the impact on  
399 cognition of the damaging genetic variation studied here is similar between the sexes  
400 suggests that, other than for autism spectrum disorder<sup>43</sup>, mate choice may be a more  
401 plausible explanation for such observations, as seen for the 22q11.2 deletion<sup>44</sup>.

402

403 These analyses have several limitations. First, we do not have longitudinal relationship data  
404 for UK Biobank participants that might shed more light on the impact of  $s_{\text{het}}$  burden on the  
405 ability to attract a partner during peak reproductive years. Second, we have not been able to  
406 explore the impact of  $s_{\text{het}}$  burden on the full range of cognitive and behavioural traits that  
407 relate to mate preferences and influence reproductive success. We anticipate that teasing  
408 out the relative contributions of correlated cognitive and behavioural traits will be  
409 challenging. Third, UK Biobank participants are biased towards higher health, educational  
410 attainment and socioeconomic status<sup>37</sup>, and as such the estimates of the negative effect of  
411  $s_{\text{het}}$  burden on reproductive fitness possibly underestimate the true effects in the general  
412 population. Finally, we cannot completely account for as-yet-undiscovered male infertility  
413 genes in these analyses; nonetheless, these results – in particular those based on clinically-  
414 and self-reported health outcomes (Figure 2; Supplementary Figure 11) – suggest a minor  
415 contribution of male infertility to the relationship between  $s_{\text{het}}$  burden and childlessness.

416

417 Our study focused on individuals of European ancestry and analogous studies across  
418 different populations and cultures are needed. Males have considerably greater variance in  
419 reproductive success than females across cultures<sup>45</sup>, including higher levels of childlessness  
420 than females<sup>26</sup>, highlighting the potential for sexual selection acting on male reproductive  
421 success to act across populations. We also note that many of the fundamental trends  
422 relating to mate preferences and male childlessness have been shown to be cross-cultural in  
423 nature<sup>21,25,45</sup>. We anticipate future studies that integrate genome-wide sequencing data on  
424 large population samples from a range of ancestries to more fully characterise the impact of  
425 sexual selection on our species.

## 426 Methods

### 427 Sample Selection and Phenotype Collation

428 To collate phenotypes for all individuals in UK Biobank, we downloaded bulk phenotype files  
429 from the UK Biobank data showcase (<https://www.ukbiobank.ac.uk/data-showcase/>; data  
430 acquired 22 Jan 2020). Due to ascertainment biases with post-recruitment data  
431 (Supplementary Figure 18), we only retained data which were ascertained at time of  
432 recruitment as opposed to those ascertained via followup (i.e. instance 0 in the UK Biobank  
433 data showcase). Please see Supplementary Table 1 for detailed descriptions of all  
434 phenotypes assessed in this manuscript, including how they were processed, if applicable.  
435 Individuals with missing data for a relevant phenotype were excluded from analysis when  
436 testing that phenotype.

437

438 Following phenotype collation, we next selected for final analysis individuals of broadly  
439 European ancestry as determined by Bycroft et al.<sup>46</sup>, which left a total of 409,617 individuals.  
440 To identify and remove related individuals, we first downloaded the relatedness file from the  
441 UK Biobank data showcase using the ukbbgene tool, which contains 107,124 relatedness  
442 pairs among UK Biobank participants<sup>46</sup>. Next, we sorted individuals by the total number of  
443 related pairs within this file, and removed the individual with the most related pairs and  
444 recalculated the total number of relationships for all other individuals. We repeated this  
445 process until no related pairs remained, which left a total of 342,717 individuals for  
446 downstream analysis.

### 447 Calling, Quality Control, and Annotation of Copy Number

#### 448 Variants from SNP Microarrays

449 To ascertain copy number variants from 488,377 UK Biobank participants with available  
450 genetic data<sup>46</sup>, we utilised the PennCNV CNV-ascertainment pipeline<sup>47</sup>. Raw CEL files were  
451 downloaded in 107 independent batches, of which 95 batches were genotyped with the  
452 standard UK Biobank array platform and 12 batches were genotyped with the UKBiLEVE  
453 array platform. Each batch was then processed independently through the following calling  
454 pipeline: first, raw CEL files were genotyped with Affymetrix power tools  
455 (<http://media.affymetrix.com/support/developer/powertools/changelog/index.html>) 'genotype'  
456 with default settings. Next, using the 'generate\_affy-geno\_cluster.pl' and  
457 'normalize\_affy\_geno\_cluster.pl' scripts provided as part of PennCNV, genotyped samples  
458 within each batch were clustered and normalised, respectively. Normalised clustering output  
459 was then split into one file per individual and provided as input to 'detect\_cnv.pl' to generate  
460 an initial call set of CNVs. Finally, initial CNVs were then passed to the 'clean\_cnv.pl' script  
461 with "-fraction" set to 0.25 in order to merge nearby CNV calls in each individual. Following  
462 CNV calling, we excluded all individuals with  $\geq 20$  CNVs and absolute waviness factor  $> 0.3$ ,  
463 and all variants on either the X or Y chromosome, which left 485,593 individuals and  
464 3,101,974 raw, redundant CNVs.

465

466 To perform quality control of ascertained CNVs, we developed a novel approach which uses  
467 individuals for which CNVs have been ascertained with both array and exome-based  
468 approaches. In short, we started with the basic logistic regression concept outlined in Mace  
469 et al.<sup>48</sup> but instead used the intersect of array- and WES-ascertained CNVs as the  
470 dependent variable in a random forest model<sup>49</sup>, with various per-individual and per-CNV  
471 metrics as predictors. To train this model, we utilised an additional set of 46,856 individuals  
472 collected as part of the INTERVAL study<sup>50</sup> genotyped on the same array as participants in  
473 UK Biobank, of which 4,465 also had matched WES data. For INTERVAL individuals, we  
474 performed array-based CNV calling identically to the method as described above and  
475 ascertained exome-based CNVs using three different algorithms with default settings:  
476 XHMM<sup>51</sup>, CANOES<sup>52</sup>, and CLAMMS<sup>53</sup>. For each INTERVAL participant for which we had  
477 both array and exome-based CNVs, we then determined a "WES overlap score" as a  
478 product of the overlap of each array-based CNV with the three WES-based callers, corrected  
479 for whether or not any overlap was possible due to probe/exon bias. Scoring results in a  
480 roughly continuous metric for each array-ascertained CNV of between zero and three, where  
481 zero represents a lack of overlap with any WES CNV call and three represents a perfect  
482 overlap with all three algorithms. For predictor covariates, we used several metrics already  
483 shown to be of high quality for CNV quality control<sup>48,54</sup>, per-CNV metrics based on these (e.g.  
484 mean log R ratio for each probe within a CNV rather than for all probes across an entire  
485 individual), and a novel metric which uses specific probes on the array known to be biased  
486 for CNV calls on bad arrays (Supplementary Table 3; see code availability). To determine  
487 estimated sensitivity/specificity of our model we performed 10-fold cross-validation, where all  
488 array CNVs which overlapped at least two exons were split into equal test and training sets  
489 and provided, separately for deletions and duplications, as input into the randomForest  
490 implementation in R as a linear predictor with nTrees set to 500. To generate a call set of  
491 final quality controlled CNVs for downstream analyses, we then trained a final random forest  
492 using all INTERVAL individuals with matched array and WES data and generated predicted  
493 WES overlap scores for all 3,101,974 raw UK Biobank CNVs identified with PennCNV as  
494 described above. CNVs were then filtered based on a predicted sensitivity of 95% based on  
495 cross-validation, leaving a remaining 1,612,931 CNVs (1,043,717 deletions, 569,114  
496 duplications).

497

498 CNVs passing quality control were then provided as input to a custom java pipeline which  
499 merged all CNVs, regardless of whether they were deletions or duplications, based on 75%  
500 reciprocal overlap to generate a set of 173,871 nonredundant loci. Following filtering to  
501 342,717 unrelated individuals of broadly European ancestry for which CNV data was  
502 available, each locus was quantified for allele frequency. Loci were then assessed for  
503 overlap with a set of known pathogenic CNVs identically to Crawford, et al.<sup>54</sup> and annotated  
504 using Variant Effect Predictor (VEP) v97<sup>55</sup>. Only loci with an annotation of  
505 'transcript\_ablation' or 'feature\_truncation' and 'coding\_sequence\_variant' for deletions, and  
506 'transcript\_amplification' or 'feature\_elongation' and 'coding\_sequence\_variant' for  
507 duplications were considered to be affecting a target gene. A total of 1,118,859 redundant  
508 CNVs remained for downstream analysis following all filtering and annotation (721,536  
509 deletions, 397,323 duplications; Supplementary Figure 2).

## 510 Processing SNV/InDel Data from WES

511 To collate protein truncating, missense, and synonymous variants for all 49,960 individuals  
512 whole exome sequenced by UK Biobank<sup>11</sup>, we downloaded the GRCh38-aligned  
513 population-level variant files from the UK Biobank (UK Biobank field 23160) and converted  
514 them to variant call format. All autosomal variants were then annotated with VEP v97<sup>55</sup>,  
515 CADDv1.5<sup>56</sup>, allele frequency from gnomAD<sup>57</sup>, PEXT<sup>58</sup> and, where relevant, MPC<sup>59</sup> and  
516 LOFTEE<sup>57</sup>. PEXT and MPC scores were converted from build37 to build38 using the  
517 CrossMap tool<sup>60</sup>. Variants were assigned to a gene based on the primary ENSEMBL  
518 transcript with the most severe consequence. Variants were considered to be PTVs if they  
519 were annotated by VEP as having a splice acceptor/donor, stop gained, or frameshift  
520 consequence. We then retained only variants with a gnomAD or UK Biobank-specific allele  
521 frequency  $\leq 1 \times 10^{-3}$  and with a PEXT mean cerebellum score  $> 0.1$ . Missense variants were  
522 only retained if they had MPC  $> 2$  and CADD  $> 25$ . PTVs were only retained if they were  
523 annotated by LOFTEE as high confidence, had CADD  $> 25$ , and were not located in the last  
524 exon or intron of the canonical transcript as annotated by ENSEMBL<sup>61</sup>. This filtering  
525 approach left a total of 2,658,431 redundant autosomal SNVs and InDels across all 34,812  
526 unrelated individuals of broadly European ancestry included in this study (Supplementary  
527 Figure 3).

528

529 It has recently been reported that the UK Biobank exome sequencing data is missing variant  
530 calls in regions where all reads were assigned MAPQ=0 (for more details, see Jia et al.<sup>62</sup>).  
531 While this issue affects 703 genes with an  $s_{\text{het}}$  value assessed in this study, genes with the  
532 highest constraint scores (i.e.  $s_{\text{het}} \geq 0.15$ ) are less likely to be affected by this problem (3.3%  
533 of genes with  $s_{\text{het}} \geq 0.15$ , 4.5% of genes with  $s_{\text{het}} < 0.15$ ; Fisher's  $p=0.02$ ). Secondly, this  
534 issue is consistent across all individuals with WES within the UK Biobank and thus results in  
535 a simple loss of power equivalent to having insufficient coverage to call variants across ~4%  
536 of the exome. Finally, as CNV calling was performed using genotyping arrays, and thus  
537 unaffected by issues with sequence alignment, our findings are independently robust.  
538 Information on exome capture baits and genes affected by alignment issues for producing  
539 this statement were acquired from the UK Biobank data showcase  
540 (<http://biobank.ctsu.ox.ac.uk/crystal/refer.cgi?id=1911>).

## 541 Calculating $s_{\text{het}}$ Burden for UK Biobank Participants

542 To calculate an individual's  $s_{\text{het}}$  burden, assuming that fitness is multiplicative and that there  
543 is no epistasis between genes which are lost, we utilised the following formula:

$$544 \quad s_{\text{het}[i,v]} = 1 - \prod_g (1 - s_{\text{het}[i,v,g]})$$

545 where  $s_{\text{het}[i,v]}$  indicates individual  $i$ 's  $s_{\text{het}}$  burden for variant class  $v$  and  $s_{\text{het}[i,v,g]}$  indicates the  
546  $s_{\text{het}}$  score for gene  $g$  with a qualifying annotation for variant class  $v$  in individual  $i$ . Possible  
547 values for  $v$  are PTV, missense, synonymous, deletion, or duplication. As indicated by the  
548 formula above,  $s_{\text{het}}$  values were calculated independently for each variant type. Per-gene  $s_{\text{het}}$   
549 values were obtained from Weghorn et al.<sup>3</sup>, under their demographic model which includes



550 drift and scores for 16,189 protein coding genes which we were able to definitively map to an  
551 ENSEMBL gene ID. To ensure that our primary result of the effect of  $s_{\text{het}}$  burden on  
552 childlessness is unaffected by the version of  $s_{\text{het}}$  we use to calculate our burden scores, we  
553 also utilised an earlier derivation of  $s_{\text{het}}$  from Cassa et al.<sup>4</sup> which does not take into account a  
554 demographic model. This did not significantly change our primary result (Supplementary  
555 Figure 22).

556

557 To explore if genes known to be associated with male infertility were responsible for our  
558 observed effect on male reproductive success, we also generated individual  $s_{\text{het}}$  scores for  
559 each variant class excluding a set of 150 autosomal genes known to be associated with  
560 male infertility (Supplementary Table 5 from Oud et al.<sup>14</sup>). Genes with an annotation of  
561 limited, moderate, strong, or definitive evidence were excluded from calculated  $s_{\text{het}}$  scores<sup>15</sup>.  
562 Similarly, and to test if a greater number of 742 genes associated with male infertility in mice  
563 were responsible for our observed effect on male reproductive success, we queried all  
564 genes from Mouse Genome Informatics<sup>15</sup> with a phenotype code of MP:0001925. Gene IDs  
565 were then translated to their human homologues and  $s_{\text{het}}$  burden scores excluding these  
566 genes were then generated and provided as input to logistic regression as described above.

567

568 To test if our observed relationship was robust when excluding genes with a known disease  
569 annotation, we also generated individual  $s_{\text{het}}$  scores where we removed 4,414  
570 disease-associated genes. We considered a gene to be disease-associated based on being  
571 a confirmed or probable developmental disorder gene in the Developmental Disorders  
572 Genotype-Phenotype Database (DDG2P; <https://decipher.sanger.ac.uk/info/ddg2p>), in the  
573 Online Mendelian Inheritance in Man (OMIM; <https://omim.org/>) Morbid Map after excluding  
574 'non disease' and 'susceptibility to multifactorial disorder' entries, or in ClinVar<sup>63</sup> with a  
575 pathogenic/likely pathogenic variant linked to a phenotype.

## 576 Logistic and Linear Modelling of Phenotypes

577 To test the association of each  $s_{\text{het}}$  burden (i.e.  $s_{\text{het}[i,v]}$ ) per variant class with a given  
578 phenotype (e.g. those in Supplementary Table 1), we used a general linear model via the  
579 'glm' function in R of the form:

580

$$581 \quad \textit{phenotype} \sim s_{\text{het}[i,v]} + \textit{age} + \textit{age}^2 + \textit{PC1}.. \textit{PC30}$$

582

583 All models were run separately for males and females. For binary phenotypes, 'family' was  
584 set to 'binomial' and for continuous phenotypes 'family' was set to 'gaussian'. To combine the  
585 effect sizes or log odds ratios for CNVs and PTVs (e.g. for Figure 1A), we used the  
586 'metagen' function from the 'meta' package<sup>64</sup> in R to perform a fixed-effects meta analysis.  
587 For logistic regression, we set parameters 'method.tau' to 'SJ' and 'sm' to 'OR'. For linear  
588 regression, we set the parameter 'sm' to "SMD". To avoid including an individual twice in our  
589 meta analysis, for samples with both CNV and PTV data available, we prioritised  
590 PTV-derived  $s_{\text{het}}$  scores.

591

592 When using raw variant counts as in Supplementary Figure 7, the  $s_{het}$  term in the above  
593 formula was changed to the total number of qualifying genes affected per individual, where  
594 qualifying genes were either those with  $pLI \geq 0.9$ <sup>57</sup> or those with  $s_{het} \geq 0.15$ <sup>3</sup>. Individuals with  
595  $> 3$  genes lost for deletions ( $pLI \geq 0.9$   $n = 43$ ;  $s_{het} \geq 0.15$   $n = 16$ ) and PTVs ( $pLI \geq 0.9$   $n = 2$ ;  
596  $s_{het} \geq 0.15$   $n = 1$ ) were removed prior to regression analyses. To provide a negative control  
597 for our association tests, we also performed associations for several neutral phenotypes we  
598 hypothesised to not be under negative selection: fresh fruit intake, handedness, and blonde  
599 hair colour (Supplementary Table 1). None of these associations were significant after  
600 correcting for multiple testing (Supplementary Figure 23).

601

602 To test the effect of individual phenotypes on likelihood of having children (Supplementary  
603 Figure 14), we used a logistic model (with the ‘family’ parameter of the ‘glm’ function set to  
604 ‘binomial’ in R) of the form:

605

$$606 \quad \text{has.children} \sim \text{phenotype} + \text{age} + \text{age}^2 + PC1..PC30$$

607

608 As with estimating the contribution of  $s_{het}$  burden to phenotypes, all analyses were run  
609 separately for both males and females. For all models involving household income, we  
610 additionally included partner at home status as a covariate, as household income was  
611 recorded per household, not per recruited individual.

612

613 Pre-computed ancestry principal components for each UK Biobank participant were taken  
614 from Bycroft et al.<sup>46</sup>. To alleviate concerns about a potentially arbitrary selection of the  
615 number of ancestry principal components used in our models, we repeated our primary  
616 analysis of the association between having children and  $s_{het}$  burden in males with between  
617 10 and 30 ancestry principal components and did not observe any significant differences in  
618 our result (Supplementary Figure 24).

619

620 All odds ratios, effect sizes, standard errors, p values, and total individuals per association  
621 test reported in this manuscript can be found in Supplementary Table 4.

## 622 Collation and Testing of Participant Medical Data

623 To assess if a broad range of medical conditions play a role in mediating the effect of high  
624  $s_{het}$  burden on childlessness, we queried two relevant datasets provided by the UK Biobank<sup>10</sup>:  
625 hospital episode statistics (HES) and combined health outcomes data (CHOD;  
626 Supplementary Table 1). Briefly, for each UK Biobank participant, HES data incorporates  
627 electronic inpatient data provided directly from NHS hospitals and CHOD aggregates HES,  
628 general practitioner records, self-reported conditions, and death records. All data sources  
629 are coded according to the International Classification of Disorders v10 (ICD-10). For the  
630 purposes of this work, we ignored all cancer codings from HES and CHOD data (ICD  
631 chapter II and codes O00-O08 of chapter XV), and instead used independent cancer registry  
632 data; the UK Biobank acquires information on cancer diagnoses from the UK cancer registry  
633 which aggregates a wide range of data sources including general practitioners, nursing  
634 homes, and hospitals and is considered the more accurate data source for UK Biobank

635 participant cancer diagnoses. Cancer codes were retained only when testing HES data  
636 (Figure 2, Supplementary Figures 11-13).

637

638 We utilised both HES and CHOD sources to examine a broad set of medical conditions in  
639 UK Biobank participants. Complete HES are available for all UK Biobank participants but are  
640 probably depleted of conditions that are unlikely to be seen in a hospital setting (e.g. male  
641 infertility). CHOD are also likely to be more sensitive to a wide variety of conditions as they  
642 incorporate aforementioned HES data with both general practitioner records and  
643 self-reported outcomes. Importantly, while general practitioner records are only available for  
644 46% (n = 230,090) of UK Biobank participants, when we tested for an association between  
645  $s_{\text{het}}$  burden and whether a participant had general practitioner records or not, we did not  
646 observe a significant association for either males (OR=1.02 [95% CI 0.75-1.37], p=0.92) or  
647 females (OR=1.26 [95% CI 0.94-1.68], p=0.12; Supplementary Figure 18). This indicated  
648 that we were unlikely to see biases due to including CHOD from individuals who were  
649 missing general practitioner records. As such, we prioritised the use of CHOD in most  
650 analyses presented in the text, figures, and supplementary information of this manuscript –  
651 complete results for all codes in both HES and CHOD data are available as Supplementary  
652 Table 2. Exceptions include when testing codings from chapters XVII to XXII which are  
653 beyond the diagnostic scope of CHOD, and cancer codes better ascertained from the UK  
654 Biobank cancer registry as noted above (Figure 2; Supplementary Figures 12, 13).

655

656 To determine the role of 19,154 diseases, disorders, and special codes collated from HES  
657 and CHOD in the relationship between  $s_{\text{het}}$  burden and childlessness (Figure 2), we used a  
658 modified version of our primary logistic model of the form:

659

$$660 \quad \text{has.children} \sim s_{\text{het}[i,v]} + \text{icd.code}_c + \text{age} + \text{age}^2 + PC1..PC30$$

661

662 Where *icd.code* represents a binarised presence/absence of one of 19,154 different ICD-10  
663 diseases, disease groups, and chapters, *c*. Tests were only performed when a given code  
664 was represented by at least 2 individuals in both genetic (i.e. CNVs) and WES (i.e. PTVs)  
665 data. When considering individuals who have a particular code, *c*, we utilised the  
666 hierarchical information present within the ICD-10 coding system. For example, when we  
667 tested if inclusion of a term for individuals with non-insulin-dependent diabetes mellitus  
668 (ICD-10 code E11) has an effect on childlessness, we also considered individuals with any  
669 sub-code (i.e. E11.0-E11.9). This same principle was also used for disease groupings –  
670 when testing the more general diabetes mellitus group (ICD-10 block E10-E14) we included  
671 all individuals with any code between E10 and E14, including disease subtypes (e.g. E11.0).  
672 For each model, we retained both an odds ratio for the effect of individual  $s_{\text{het}}$  burden and  
673 presence of a given code on childlessness (Supplementary Table 2).

## 674 Evaluation of Gene Expression in Testis

675 To determine the expression in testis of all genes assessed in this study, we downloaded  
676 processed median transcripts per million values for all genes provided by v7 of the GTEx  
677 study

678 ([https://storage.googleapis.com/gtex\\_analysis\\_v8/rna\\_seq\\_data/GTEX\\_Analysis\\_2017-06-0](https://storage.googleapis.com/gtex_analysis_v8/rna_seq_data/GTEX_Analysis_2017-06-0)  
679 [5\\_v8\\_RNASeQCv1.1.9\\_gene\\_median\\_tpm.gct.gz](https://storage.googleapis.com/gtex_analysis_v8/rna_seq_data/GTEX_Analysis_2017-06-05_v8_RNASeQCv1.1.9_gene_median_tpm.gct.gz)). Only genes for which an  $s_{\text{het}}$  score was  
680 available<sup>3</sup> were retained from this file. We then determined if each gene was affected by  
681 either a private deletion or PTV in a UK Biobank individual. We then plotted  
682  $\ln(\text{testis expression})$  in two ways: (i) as a factor of being a male infertility gene or not or (ii)  
683 having or not having a qualifying variant (Supplementary Figure 10). To determine  
684 significance we used a one-sided Wilcoxon test, with the alternate hypothesis that  
685 expression in testis of male infertility genes or genes with private variants is greater than the  
686 alternative set.

## 687 Modelling the Contribution of Phenotypes to Observed 688 Reduction in Fitness

### 689 **Variant $s_{\text{het}}$ Burden**

690 To estimate the contribution of  $s_{\text{het}}$  to overall fitness (Figure 4B), we extracted log odds ratio  
691 estimates for the effect of  $s_{\text{het}}$  on having children from our logistic model and estimated the  
692 proportion of childless individuals at various  $s_{\text{het}}$  scores (0 to 1 at 0.1 intervals;  
693 Supplementary Figure 21). To calculate the error in our estimates (i.e. the shaded areas in  
694 Figure 4B), we used the 95% confidence intervals for the  $s_{\text{het}}$  burden log odds ratio from our  
695 original logistic regression. Please see Supplementary Note 1 for a more detailed description  
696 of how the contribution of  $s_{\text{het}}$  to overall fitness was calculated.

697

### 698 **General Cognition**

699 When possible, we used independent estimates from population level or external data to  
700 alleviate biases in UK Biobank phenotype ascertainment (Supplementary Figure 18)<sup>35</sup>. As  
701 such, data on cognitive ability and fertility are collected from Swedish population-level  
702 government administrative registers that have been linked to Swedish conscription  
703 registers<sup>65</sup>. To assess assignment into different branches of a universal conscription for  
704 Swedish men, the Swedish government included an extensive cognitive ability test which all  
705 men in Sweden had to take part in. Information on childbearing is based on birth records,  
706 and linkage to both men and women is nearly universal, partly due to universal government  
707 identity numbers, combined with serious paternity investigations in case of missing  
708 information of the biological father. This information was used to calculate reproductive  
709 fertility histories in 2012 for all men included in this study. We include data on all Swedish  
710 born men who participated in the military conscription test at age 18-20 who were born  
711 1965-1967. The conscription registers are described in more detail elsewhere<sup>32,66</sup>.

712

713 For the current study, we did not rely on the official cognitive ability scores assigned for each  
714 man following their cognitive ability test as in Kolk and Barclay<sup>67</sup>, but instead made manual  
715 calculations to create a more finely grained measure from raw test scores based on a battery  
716 of cognitive ability tests that are available for 3 years in our conscription registers. The  
717 Swedish military created an official IQ-measure based on a 9-score stanine scale that has  
718 been used in a large number of scientific studies<sup>67,68</sup>. In the current study we developed a  
719 more detailed score using information on the actual test scores of men participating in the  
720 test. The conscription test consisted of four large subtests measuring different dimensions of  
721 IQ with logical, spatial, verbal, and technical subtest<sup>66,69,70</sup>. To get a more finely tuned IQ

722 measure than the official stanine measure we used the raw test scores of each of these four  
723 tests and summed the total number of correct questions for these four sub-tests. Within each  
724 stanine IQ score, we then examined the distribution of test scores and after standardising  
725 the test scores using only variation within each stanine score, calculated a new detailed IQ  
726 score. This procedure is done to anchor our new IQ measure in the official stanine IQ score.  
727 As our test scores have some missing values for men with very high and very low stanine  
728 scores, this procedure results in a slightly underdispersed distribution and our new calibrated  
729 IQ score has  $\mu = 100$  &  $\sigma = 12$ , as compared to the official stanine measure with  $\mu = 100$  &  $\sigma$   
730  $= 15$ .

731

732 This score allows us to calculate cognitive ability by single digit IQ scores (Supplementary  
733 Table 5); however, as we had to rely on only observations with complete test scores for all  
734 test batteries, our data has a higher share of excluded men than the official cognitive ability  
735 scores (used by Kolk and Barclay<sup>32</sup> and others). In addition to the ~5% of men that did not  
736 take the test (e.g. they were ineligible for military service due to handicap such as visual  
737 impairments, that they were abroad, or were conscripted at an atypical age), we additionally  
738 excluded a number of men for which scores of all test batteries were not available. Our  
739 manually computed fine-grained measure was later standardised against the official  
740 cognitive ability test score to maintain comparability and to assure our slightly smaller  
741 population is still representative of the complete cohort. Compared to most other measures  
742 of cognitive ability in the scientific literature, we argue that our population is unusually  
743 representative as little (indirect) pre-selection due to cognitive ability took place.

744

745 We first estimated the effect of overall  $s_{\text{net}}$  burden on fluid intelligence (Figure 3F) and,  
746 because fluid intelligence is normalised and IQ is normally distributed, converted this effect  
747 to a predicted change of IQ. To then estimate childlessness and fertility for low IQ values not  
748 actually observed in the general population, we fit actual observations to a sigmoidal model  
749 using the function 'nls' in R (Supplementary Figure 17; Supplementary Table 5). As our  
750 empirical distribution did not conform to a standard test distribution, we then simulated  
751 100,000 individuals, with IQ values for each individual randomly selected from our original  
752 Swedish IQ distribution with the mean shifted by the expected reduction in IQ as explained  
753 by our  $s_{\text{net}}$  model. We then assigned each simulated individual an expected number of  
754 children and predicted probability of childlessness based on their simulated IQ value as  
755 given in Supplementary Table 5. Number of children across all 100,000 individuals was then  
756 averaged to generate an expected mean fertility for a given  $s_{\text{net}}$  score (Supplementary Figure  
757 16). This value was then compared to the mean number of children for the unburdened  
758 population via the following formula:

759

$$fertility.ratio = \frac{fertility_{s_{\text{net}}(1)}}{fertility_{s_{\text{net}}(0)}}$$

760 To then calculate the proportion of reduced reproductive success explained by IQ (and by  
761 extrapolation, other traits) we then divide this fertility ratio by the overall reduction in fitness  
762 given by  $s_{\text{net}}$  as described above. Please see Supplementary Note 2 for a more detailed  
763 example of how we performed this calculation.

764

#### 765 **Mental Health Disorders**

766 As with general cognition, we used estimates from external studies to alleviate biases in UK  
767 Biobank phenotype ascertainment (Supplementary Figure 18)<sup>35</sup>. In this case, as we were

768 unable to accurately estimate the increased risk of developing individual mental health  
769 disorders as a factor of individual  $s_{het}$  burden, we instead utilised odds ratios from Ganna et  
770 al.<sup>9</sup>. Only odds ratios for schizophrenia, autism spectrum disorder, and bipolar disorder were  
771 retained. As Ganna et al.<sup>9</sup> estimated the risk based on total count of high pLI ( $\geq 0.9$ )<sup>57</sup> genes  
772 with PTVs per individual instead of with  $s_{het}$ , we assumed that an individual carrying one  
773 such variant had an  $s_{het}$  burden of 0.162, or the mean  $s_{het}$  value of all high pLI ( $\geq 0.9$ ) genes.  
774 We then converted this into a proportion of individuals with a given mental health disorder,  $t$ ,  
775 at  $s_{het}$  burden,  $x$ , by scaling the odds ratio with the following formula:

$$776 \quad \log(OR_{s_{het}[x,t]}) = \frac{\log(OR_{ganna}) * s_{het}[x]}{0.162}$$

777 To establish a baseline expectation for the prevalence of each mental health disorder at  $s_{het}$  0  
778 we utilised population-level data from Power et al.<sup>19</sup> and extrapolated for each trait at  
779 increasing  $s_{het}$  values (Supplementary Figure 25). To generate an expected mean number of  
780 children for simulated individuals with mental health disorders, we used fertility statistics  
781 generated by Power et al.<sup>19</sup>. As Power et al.<sup>19</sup> did not provide childlessness data, we were  
782 unable to generate expected childlessness as we did for other traits. Overall predicted  
783 reduced fitness attributable to mental health and all values used for performing the above  
784 analyses are provided in Supplementary Table 6.

785

#### 786 ***Having a Partner at Home, Having had Sex, Educational Attainment, and Infertility***

787 To determine the contribution of having a partner at home, ever having had sex, educational  
788 attainment, and a medical diagnosis of infertility to the relationship between  $s_{het}$  burden and  
789 childlessness, we utilised a multiple regression model incorporating various combinations of  
790 these traits (Figure 4A; Supplementary Figure 20). First, we calculated the variance in  
791 childlessness explained by a null model consisting of age, age<sup>2</sup>, and the first 30 ancestry  
792 PCs using Nagelkerke's pseudo- $r^2$  as calculated using the "nagelkerke" function from the R  
793 package "rcompanion" (<https://rcompanion.org/handbook/>). Next, to determine the proportion  
794 of variance explained in childlessness by  $s_{het}$  alone, we calculated incremental pseudo- $r^2$   
795 between this null model and a model additionally incorporating a term for deletion  $s_{het}$   
796 burden. We then repeated this analysis, except now including an additional covariate (e.g.  
797 having a partner at home) to determine the reduction in variance explained by deletion  $s_{het}$   
798 when correcting for the additional covariate. This reduction in variance was then converted  
799 to a percent change via the following formula:

$$800 \quad \% \text{ reduction in variance explained by deletion } s_{het} = \frac{s_{het} \text{ incremental } r^2 \text{ with covariate}}{s_{het} \text{ incremental } r^2 \text{ without covariate}}$$

801 This basic analysis was then repeated for all possible combinations of having a partner at  
802 home, ever having had sex, having a university degree, and having a medical diagnosis of  
803 infertility (Figure 4A; Supplementary Figure 20). Percent reduction in variance explained  
804 values plotted in Figure 4A and Supplementary Figure 20 are displayed for  $s_{het}$  calculated  
805 using deletions only.

806

807 Relatively complete mental health disorder data are available for all individuals via the  
808 complete health outcomes data; therefore, we also included a covariate for having a mental  
809 health disorder as a covariate in our multiple regression model (Figure 4A). As income is  
810 provided by UK Biobank on a per-household basis (Figure 3E) and the number of individuals  
811 with fluid intelligence data recorded at recruitment is significantly smaller than for other  
812 covariates (Figure 3F), we did not include these as part of our multiple regression model.

## 813 Acknowledgements

814 We thank Leopold Parts, Molly Przeworski and George Davey-Smith for useful discussions  
815 and comments during manuscript preparation. We thank the INTERVAL study for sharing  
816 genotyping and exome data that allowed us to refine our CNV filtering methodology. We  
817 thank Manon Oud and Joris Veltman for helpful discussions regarding male infertility in mice.  
818 We thank the reviewers for constructive comments and criticism. This work has been funded  
819 by core Wellcome funding to the Wellcome Sanger Institute (grant WT098051). This work  
820 has been conducted using the UK Biobank Resource under application numbers 14421 (to  
821 G.K.) and 44165 (to H.C.M.).

## 822 Author Contributions

823 E.J.G, M.D.C.N, and K.E.S. assessed the contribution of rare genetic variation to the  
824 phenotypes and vital statistics presented in this manuscript. E.J.G and G.K. performed CNV  
825 calling. E.J.G. and M.E.K.N. annotated and assessed SNV and InDel variants from provided  
826 WES data. K.B., M.K., E.J.G, and M.E.H. curated and analysed Swedish IQ data. E.J.G.,  
827 K.E.S., H.C.M., and M.E.H. designed experiments, oversaw the study and wrote the  
828 manuscript.

## 829 Data Availability

830 CNVs, SNVs and InDels included in this study will be returned to the UK Biobank following  
831 study publication, as per UK Biobank guidelines.

## 832 Code Availability

833 Code used as part of this project to perform phenotype testing, CNV calling, variant quality  
834 control, and generate all main text figures, supplementary figures and supplementary tables  
835 is available on github: <https://github.com/eugenegardner/UKBBFertility>.

## 836 References

- 837 1. Lek, M. *et al.* Analysis of protein-coding genetic variation in 60,706 humans. *Nature* **536**,  
838 285–291 (2016).
- 839 2. Collins, R. L. *et al.* A structural variation reference for medical and population genetics.  
840 *Nature* **581**, 444–451 (2020).
- 841 3. Weghorn, D. *et al.* Applicability of the Mutation-Selection Balance Model to Population

- 842 Genetics of Heterozygous Protein-Truncating Variants in Humans. *Mol. Biol. Evol.* **36**,  
843 1701–1710 (2019).
- 844 4. Cassa, C. A. *et al.* Estimating the selective effects of heterozygous protein-truncating  
845 variants from human exome data. *Nat. Genet.* **49**, 806–810 (2017).
- 846 5. Darwin, C. The descent of man, and selection in relation to sex. By Charles Darwin.  
847 (1874) doi:10.5962/bhl.title.16749.
- 848 6. Ganna, A. *et al.* Ultra-rare disruptive and damaging mutations influence educational  
849 attainment in the general population. *Nat. Neurosci.* **19**, 1563–1565 (2016).
- 850 7. Männik, K. *et al.* Copy number variations and cognitive phenotypes in unselected  
851 populations. *JAMA* **313**, 2044–2054 (2015).
- 852 8. Huguet, G. *et al.* Measuring and Estimating the Effect Sizes of Copy Number Variants  
853 on General Intelligence in Community-Based Samples. *JAMA Psychiatry* **75**, 447–457  
854 (2018).
- 855 9. Ganna, A. *et al.* Quantifying the Impact of Rare and Ultra-rare Coding Variation across  
856 the Phenotypic Spectrum. *Am. J. Hum. Genet.* **102**, 1204–1211 (2018).
- 857 10. Sudlow, C. *et al.* UK biobank: an open access resource for identifying the causes of a  
858 wide range of complex diseases of middle and old age. *PLoS Med.* **12**, e1001779  
859 (2015).
- 860 11. Van Hout, C. V. *et al.* Exome sequencing and characterization of 49,960 individuals in  
861 the UK Biobank. *Nature* **586**, 749–756 (2020).
- 862 12. Dudel, C. & Klüsener, S. Estimating men's fertility from vital registration data with  
863 missing values. *Population Studies* vol. 73 439–449 (2019).
- 864 13. Office of National Statistics. Birth Summary Tables, England and Wales 2019. (2020).
- 865 14. Oud, M. S. *et al.* A systematic review and standardized clinical validity assessment of  
866 male infertility genes. *Hum. Reprod.* **34**, 932–941 (2019).
- 867 15. Bult, C. J. *et al.* Mouse Genome Database (MGD) 2019. *Nucleic Acids Res.* **47**,



- 868 D801–D806 (2019).
- 869 16. Huang, N. *et al.* A Screen for Genomic Disorders of Infertility Identifies MAST2  
870 Duplications Associated with Nonobstructive Azoospermia in Humans. *Biol. Reprod.* **93**,  
871 61 (2015).
- 872 17. Skjaerven, R., Wilcox, A. J. & Lie, R. T. A population-based study of survival and  
873 childbearing among female subjects with birth defects and the risk of recurrence in their  
874 children. *N. Engl. J. Med.* **340**, 1057–1062 (1999).
- 875 18. Lie, R. T., Wilcox, A. J. & Skjaerven, R. Survival and reproduction among males with  
876 birth defects and risk of recurrence in their children. *JAMA* **285**, 755–760 (2001).
- 877 19. Power, R. A. *et al.* Fecundity of patients with schizophrenia, autism, bipolar disorder,  
878 depression, anorexia nervosa, or substance abuse vs their unaffected siblings. *JAMA*  
879 *Psychiatry* **70**, 22–30 (2013).
- 880 20. Allen, M. S. The Role of Personality in Sexual and Reproductive Health. *Current*  
881 *Directions in Psychological Science* vol. 28 581–586 (2019).
- 882 21. Buss, D. M. *et al.* International Preferences in Selecting Mates: A Study of 37 Cultures.  
883 *J. Cross. Cult. Psychol.* **21**, 5–47 (1990).
- 884 22. Pawłowski, B. & Dunbar, R. I. Impact of market value on human mate choice decisions.  
885 *Proc. Biol. Sci.* **266**, 281–285 (1999).
- 886 23. Buss, D. M. & Schmitt, D. P. Mate Preferences and Their Behavioral Manifestations.  
887 *Annu. Rev. Psychol.* **70**, 77–110 (2019).
- 888 24. Fieder, M., Huber, S. & Bookstein, F. L. Socioeconomic status, marital status and  
889 childlessness in men and women: an analysis of census data from six countries. *J.*  
890 *Biosoc. Sci.* **43**, 619–635 (2011).
- 891 25. Nettle, D. & Pollet, T. V. Natural selection on male wealth in humans. *Am. Nat.* **172**,  
892 658–666 (2008).
- 893 26. Miettinen, A., Rotkirch, A., Szalma, I., Donno, A. & Tanturri, M.-L. *Increasing*

- 894 *childlessness in Europe: time trends and country differences*. (Family and Societies  
895 Working Paper 33, 2015).
- 896 27. Jalovaara, M. *et al.* Education, Gender, and Cohort Fertility in the Nordic Countries. *Eur.*  
897 *J. Popul.* **35**, 563–586 (2019).
- 898 28. Fieder, M. & Huber, S. The effects of sex and childlessness on the association between  
899 status and reproductive output in modern society. *Evolution and Human Behavior* vol.  
900 28 392–398 (2007).
- 901 29. Barthold, J. A., Myrskylä, M. & Jones, O. R. Childlessness drives the sex difference in  
902 the association between income and reproductive success of modern Europeans.  
903 *Evolution and Human Behavior* vol. 33 628–638 (2012).
- 904 30. Bateman, A. J. Intra-sexual selection in *Drosophila*. *Heredity* **2**, 349–368 (1948).
- 905 31. Trivers, R. Parental Investment and Sexual Selection. in *Sexual selection and the*  
906 *descent of man* (ed. Campbell, B.) (Aldine, 1972).
- 907 32. Kolk, M. & Barclay, K. Cognitive ability and fertility among Swedish men born  
908 1951-1967: evidence from military conscription registers. *Proc. Biol. Sci.* **286**, 20190359  
909 (2019).
- 910 33. Kendall, K. M. *et al.* Cognitive Performance Among Carriers of Pathogenic Copy  
911 Number Variants: Analysis of 152,000 UK Biobank Subjects. *Biol. Psychiatry* **82**,  
912 103–110 (2017).
- 913 34. Davis, K. A. S. *et al.* Mental health in UK Biobank - development, implementation and  
914 results from an online questionnaire completed by 157 366 participants: a reanalysis.  
915 *BJPsych Open* **6**, e18 (2020).
- 916 35. Tyrrell, J. *et al.* Genetic predictors of participation in optional components of UK  
917 Biobank. *Cold Spring Harbor Laboratory* 2020.02.10.941328 (2020)  
918 doi:10.1101/2020.02.10.941328.
- 919 36. Stefansson, H. *et al.* CNVs conferring risk of autism or schizophrenia affect cognition in

- 920 controls. *Nature* vol. 505 361–366 (2014).
- 921 37. Fry, A. *et al.* Comparison of Sociodemographic and Health-Related Characteristics of  
922 UK Biobank Participants With Those of the General Population. *Am. J. Epidemiol.* **186**,  
923 1026–1034 (2017).
- 924 38. Watanabe, K. *et al.* A global overview of pleiotropy and genetic architecture in complex  
925 traits. *Nat. Genet.* **51**, 1339–1348 (2019).
- 926 39. Clark, D. W. *et al.* Associations of autozygosity with a broad range of human  
927 phenotypes. *Nat. Commun.* **10**, 4957 (2019).
- 928 40. Stanley, K. E. *et al.* Causal Genetic Variants in Stillbirth. *N. Engl. J. Med.* (2020)  
929 doi:10.1056/NEJMoa1908753.
- 930 41. Kaplanis, J. *et al.* Evidence for 28 genetic disorders discovered by combining healthcare  
931 and research data. *Nature* **586**, 757–762 (2020).
- 932 42. Girirajan, S. *et al.* Phenotypic heterogeneity of genomic disorders and rare copy-number  
933 variants. *N. Engl. J. Med.* **367**, 1321–1331 (2012).
- 934 43. De Rubeis, S. *et al.* Synaptic, transcriptional and chromatin genes disrupted in autism.  
935 *Nature* **515**, 209–215 (2014).
- 936 44. Costain, G., Chow, E. W. C., Silversides, C. K. & Bassett, A. S. Sex differences in  
937 reproductive fitness contribute to preferential maternal transmission of 22q11.2  
938 deletions. *J. Med. Genet.* **48**, 819–824 (2011).
- 939 45. Betzig, L. Means, variances, and ranges in reproductive success: comparative  
940 evidence. *Evolution and Human Behavior* vol. 33 309–317 (2012).
- 941 46. Bycroft, C. *et al.* The UK Biobank resource with deep phenotyping and genomic data.  
942 *Nature* **562**, 203–209 (2018).
- 943 47. Wang, K. *et al.* PennCNV: an integrated hidden Markov model designed for  
944 high-resolution copy number variation detection in whole-genome SNP genotyping data.  
945 *Genome Res.* **17**, 1665–1674 (2007).

- 946 48. Macé, A. *et al.* New quality measure for SNP array based CNV detection. *Bioinformatics*  
947 **32**, 3298–3305 (2016).
- 948 49. Liaw, A. & Wiener, M. Classification and Regression by Randomforest. *R news* **2**, 285  
949 (2002).
- 950 50. Di Angelantonio, E. *et al.* Efficiency and safety of varying the frequency of whole blood  
951 donation (INTERVAL): a randomised trial of 45 000 donors. *Lancet* **390**, 2360–2371  
952 (2017).
- 953 51. Fromer, M. *et al.* Discovery and statistical genotyping of copy-number variation from  
954 whole-exome sequencing depth. *Am. J. Hum. Genet.* **91**, 597–607 (2012).
- 955 52. Backenroth, D. *et al.* CANOES: detecting rare copy number variants from whole exome  
956 sequencing data. *Nucleic Acids Res.* **42**, e97 (2014).
- 957 53. Packer, J. S. *et al.* CLAMMS: a scalable algorithm for calling common and rare copy  
958 number variants from exome sequencing data. *Bioinformatics* **32**, 133–135 (2016).
- 959 54. Crawford, K. *et al.* Medical consequences of pathogenic CNVs in adults: analysis of the  
960 UK Biobank. *J. Med. Genet.* **56**, 131–138 (2019).
- 961 55. McLaren, W. *et al.* The Ensembl Variant Effect Predictor. *Genome Biology* vol. 17  
962 (2016).
- 963 56. Rentzsch, P., Witten, D., Cooper, G. M., Shendure, J. & Kircher, M. CADD: predicting  
964 the deleteriousness of variants throughout the human genome. *Nucleic Acids Research*  
965 vol. 47 D886–D894 (2019).
- 966 57. Karczewski, K. J. *et al.* The mutational constraint spectrum quantified from variation in  
967 141,456 humans. *Nature* **581**, 434–443 (2020).
- 968 58. Cummings, B. B. *et al.* Transcript expression-aware annotation improves rare variant  
969 interpretation. *Nature* **581**, 452–458 (2020).
- 970 59. Samocha, K. E. *et al.* Regional missense constraint improves variant deleteriousness  
971 prediction. (2017) doi:10.1101/148353.

- 972 60. Zhao, H. *et al.* CrossMap: a versatile tool for coordinate conversion between genome  
973 assemblies. *Bioinformatics* **30**, 1006–1007 (2014).
- 974 61. Kersey, P. J. *et al.* Ensembl Genomes 2016: more genomes, more complexity. *Nucleic*  
975 *Acids Res.* **44**, D574–80 (2016).
- 976 62. Jia, T., Munson, B., Lango Allen, H., Ideker, T. & Majithia, A. R. Thousands of missing  
977 variants in the UK Biobank are recoverable by genome realignment. *Ann. Hum. Genet.*  
978 **84**, 214–220 (2020).
- 979 63. Landrum, M. J. *et al.* ClinVar: improving access to variant interpretations and supporting  
980 evidence. *Nucleic Acids Res.* **46**, D1062–D1067 (2018).
- 981 64. Balduzzi, S., Rücker, G. & Schwarzer, G. How to perform a meta-analysis with R: a  
982 practical tutorial. *Evid. Based. Ment. Health* **22**, 153–160 (2019).
- 983 65. Sweden, S. *Multi-generation register 2016: A description of contents and quality.*  
984 (Statistics Sweden, Population and Welfare Department, 2017).
- 985 66. Carlstedt, B. Cognitive abilities - aspects of structure, process and measurement.  
986 (University of Gothenburg, 2000).
- 987 67. Kolk, M. & Barclay, K. Cognitive ability and fertility among Swedish men born  
988 1951-1967: evidence from military conscription registers. *Proc. Biol. Sci.* **286**, 20190359  
989 (2019).
- 990 68. Hällsten, M. Inequality across three and four generations in Egalitarian Sweden: 1st and  
991 2nd cousin correlations in socio-economic outcomes. *Research in Social Stratification*  
992 *and Mobility* vol. 35 19–33 (2014).
- 993 69. Mårdberg, B. & Carlstedt, B. Swedish Enlistment Battery (SEB): Construct Validity and  
994 Latent Variable Estimation of Cognitive Abilities by the CAT–SEB. *International Journal*  
995 *of Selection and Assessment* vol. 6 107–114 (1998).
- 996 70. Rönnlund, M., Carlstedt, B., Blomstedt, Y., Nilsson, L.-G. & Weinehall, L. Secular trends  
997 in cognitive test performance: Swedish conscript data 1970–1993. *Intelligence* vol. 41

998 19–24 (2013).

999
